# 1 **Microbial Biosynthesis of Lactate Esters**

2

3 Jong-Won Lee<sup>1,2</sup> and Cong T. Trinh<sup>1,2,3,§</sup>

4

5 <sup>1</sup>Bredesen Center for Interdisciplinary Research and Graduate Education, University of Tennessee,  
6 Knoxville, TN, USA

7 <sup>2</sup>Center for Bioenergy Innovation, Oak Ridge National Laboratory, Oak Ridge, TN, USA

8 <sup>3</sup>Department of Chemical and Biomolecular Engineering, University of Tennessee, Knoxville, TN,  
9 USA

10

11 <sup>§</sup>Corresponding author.

12 Cong T. Trinh

13 Dept of Chemical and Biomolecular Engineering

14 University of Tennessee, Knoxville

15 1512 Middle Dr., DO#432

16 Knoxville, TN 37996

17 [ctrinh@utk.edu](mailto:ctrinh@utk.edu)

18

19 Additional Contact Information:

20 Jong-Won Lee: [biojwlee@gmail.com](mailto:biojwlee@gmail.com)

## 21 ABSTRACT

22 **Background.** Green organic solvents such as lactate esters have broad industrial applications and  
23 favorable environmental profiles. Thus, manufacturing and use of these biodegradable solvents  
24 from renewable feedstocks help benefit the environment. However, to date, the direct microbial  
25 biosynthesis of lactate esters from fermentable sugars has not yet been demonstrated.

26 **Results.** In this study, we present a microbial conversion platform for direct biosynthesis of lactate  
27 esters from fermentable sugars. First, we designed a pyruvate-to-lactate ester module, consisting  
28 of a lactate dehydrogenase (*ldhA*) to convert pyruvate to lactate, a propionate CoA-transferase  
29 (*pct*) to convert lactate to lactyl-CoA, and an alcohol acyltransferase (*AAT*) to condense lactyl-  
30 CoA and alcohol(s) to make lactate ester(s). By generating a library of five pyruvate-to-lactate  
31 ester modules with divergent *AAT*s, we screened for the best module(s) capable of producing a  
32 wide range of linear, branched, and aromatic lactate esters with an external alcohol supply. By co-  
33 introducing a pyruvate-to-lactate ester module and an alcohol (i.e., ethanol, isobutanol) module  
34 into a modular *Escherichia coli* (chassis) cell, we demonstrated for the first time the microbial  
35 biosynthesis of ethyl and isobutyl lactate esters directly from glucose. In an attempt to enhance  
36 ethyl lactate production as a proof-of-study, we re-modularized the pathway into 1) the upstream  
37 module to generate the ethanol and lactate precursors and 2) the downstream module to generate  
38 lactyl-CoA and condense it with ethanol to produce the target ethyl lactate. By manipulating the  
39 metabolic fluxes of the upstream and downstream modules through plasmid copy numbers,  
40 promoters, ribosome binding sites, and environmental perturbation, we were able to probe and  
41 alleviate the metabolic bottlenecks by improving ethyl lactate production by 4.96-fold. We found

42 that AAT is the most rate limiting step in biosynthesis of lactate esters likely due to its low activity  
43 and specificity towards the non-natural substrate lactyl-CoA and alcohols.

44 **Conclusions.** We have successfully established the biosynthesis pathway of lactate esters from  
45 fermentable sugars and demonstrated for the first time the direct fermentative production of lactate  
46 esters from glucose using an *E. coli* modular cell. This study defines a cornerstone for the microbial  
47 production of lactate esters as green solvents from renewable resources with novel industrial  
48 applications.

49

50 **Keywords:** ester; lactate ester; ethyl lactate; isobutyl lactate; acetate ester; alcohol acyltransferase;  
51 green solvent; modular cell; *Escherichia coli*.

## 52 **BACKGROUND**

53 Solvents are widely used as primary components of cleaning agents, adhesives, and coatings and  
54 in assisting mass and heat transfer, separation and purification of chemical processes [1]. However,  
55 these solvents are volatile organic compounds (VOCs) that contribute to ozone depletion and  
56 photochemical smog via free radical air oxidation and hence cause many public health problems  
57 such as eye irritation, headache, allergic skin reaction, and cancer [1, 2]. Thus, recent interest in  
58 use of alternative green solvents is increasing due to environmental regulation and compelling  
59 demand for the eco-friendly solvents derived from renewable sources [3, 4].

60 Lactate esters are platform chemicals that have a broad range of industrial applications in  
61 flavor, fragrance, and pharmaceutical industries [5]. These esters are generally considered as green  
62 solvents because of their favorable toxicological and environmental profiles. For instance, ethyl  
63 lactate is 100% biodegradable, non-carcinogenic, non-corrosive, low volatile, and unhazardous to  
64 human health and the environment [6]. Due to the unique beneficial properties of ethyl lactate, it  
65 has been approved as a Significant New Alternatives Policy (SNAP) solvent by the U.S.  
66 Environmental Protection Agency (EPA) and as food additives by the U.S. Food and Drug  
67 Administration (FDA) [6]. Recent technical and economic analysis conducted by the National  
68 Renewable Energy Laboratory (NREL) considers ethyl lactate to be one of the top twelve  
69 bioproducts [7].

70 In industrial chemical processes, lactate esters are currently produced by esterification of  
71 lactic acid with alcohols using homogenous catalysts (e.g., sulfuric acid, hydrogen chloride, and/or  
72 phosphoric acid) under high temperature reaction conditions [8]. However, use of strong acids as  
73 catalysts cause corrosive problems and often require more costly equipment for process operation  
74 and safety. Furthermore, the esterification reactions are thermodynamically unfavorable ( $\Delta G = +5$

75 kcal/mol) in aqueous solutions and often encounter significant challenge due to self-  
76 polymerization of lactate [9]. Alternatively, microbial catalysts can be harnessed to produce these  
77 esters from renewable and sustainable feedstocks in a thermodynamically favorable reaction ( $\Delta G$   
78 = -7.5 kcal/mol) in an aqueous phase environment at room temperature and atmospheric pressure  
79 [10-16]. This reaction uses an alcohol acyltransferase (AAT) to generate an ester by condensing  
80 an alcohol and an acyl-CoA. AAT can catalyze a broad substrate range including i) linear or  
81 branched short-to-long chain fatty alcohols [10, 11, 17], ii) aromatic alcohols [18], and iii)  
82 terpenols [19-22] as well as various fatty acyl-CoAs [11, 13]. To date, while microbial biosynthesis  
83 of the precursor metabolites for lactate esters have been well established such as lactate [13, 16,  
84 23-27], lactyl-CoA [28-30], ethanol [31, 32], propanol [33], isopropanol [34], butanol [35],  
85 isobutanol [36], amyl alcohol [37], isoamyl alcohol [38], benzyl alcohol [39], 2-phenylethanol [40,  
86 41], and terpenols [19-22], the direct microbial biosynthesis of lactate esters from fermentable  
87 sugars has not yet been demonstrated.

88         In this work, we aimed to demonstrate the feasibility of microbial production of lactate  
89 esters as green organic solvents from renewable resources. To enable the direct microbial  
90 biosynthesis of lactate esters from fermentable sugars, we first screened for an efficient AAT  
91 suitable for lactate ester production using a library of five pyruvate-to-lactate ester modules with  
92 divergent AATs. We next demonstrated direct fermentative biosynthesis of ethyl and isobutyl  
93 lactate esters from glucose by co-introducing a pyruvate-to-lactate ester module and an alcohol  
94 module (i.e., ethanol and isobutanol) into an engineered *Escherichia coli* modular cell. As a proof-  
95 of-study to improve ethyl lactate production, we employed a combination of metabolic engineering  
96 and synthetic biology approaches to dissect the pathway to probe and alleviate the potential  
97 metabolic bottlenecks.

98

## 99 **RESULTS AND DISCUSSION**

### 100 ***In vivo* screening of efficient AATs critical for lactate ester biosynthesis**

101           The substrate specificity of AATs is critical to produce target esters [13]. For example,  
102 ATF1 exhibits substrate preference for biosynthesis of acyl (C4-C6) acetates while SAAT and  
103 VAAT prefer biosynthesis of ethyl (C2-C6) acylates. Even though both SAAT and VAAT are  
104 derived from the same strawberry genus, they also show very distinct substrate preferences;  
105 specifically, SAAT prefers longer (C4-C6) acyl-CoAs whereas VAAT prefers shorter (C2-C4)  
106 acyl-CoAs. To date, none of AATs have been tested for lactate ester biosynthesis. Thus, to enable  
107 lactate ester biosynthesis, we began with identification of the best AAT candidate. We designed,  
108 constructed, and characterized a library of five pyruvate-to-lactate ester modules (pJW002-006)  
109 carrying five divergent AATs including ATF1, ATF2, SAAT, VAAT, and AtfA, respectively.  
110 AtfA was used as a negative control because it prefers long-chain acyl-CoAs (C14-C18) and  
111 alcohols (C14-C18) [42]. For characterization, 2 g/L of ethanol, propanol, butanol, isobutanol,  
112 isoamyl alcohol, and benzyl alcohol were added to culture media with 0.5 mM of IPTG for  
113 pathway induction to evaluate biosynthesis of six different lactate esters including ethyl lactate,  
114 propyl lactate, butyl lactate, isobutyl lactate, isoamyl lactate, and benzyl lactate, respectively, in  
115 high-cell density cultures (Fig. 1A).

116           The results show that most of the strains could produce different types of lactate esters with  
117 external supply of alcohols (Fig. 1B, 1C). EcJW104 achieved the highest titer of lactate esters in  
118 all cases, producing  $1.59 \pm 0.04$  mg/L of ethyl lactate,  $5.46 \pm 0.25$  mg/L of propyl lactate,  $11.75 \pm$   
119  $0.43$  mg/L of butyl lactate,  $9.92 \pm 0.08$  mg/L of isobutyl lactate,  $24.73 \pm 0.58$  mg/L of isoamyl  
120 lactate, and  $51.59 \pm 2.09$  mg/L of benzyl lactate in ethanol, propanol, butanol, isobutanol, isoamyl

121 alcohol, and benzyl alcohol doping, respectively. The lactate ester biosynthesis of EcJW104  
122 exhibited different alcohol substrate preference in the following order: benzyl alcohol > isoamyl  
123 alcohol > butanol > isobutanol > propanol > ethanol (Fig. 1B, Supplementary Table S2).

124 Due to the presence of endogenous acetyl-CoA, we also produced acetate esters in addition  
125 to lactate esters (Fig. 1). Among the strains, EcJW101 achieved the highest titers of acetate esters  
126 in all cases, producing  $115.52 \pm 4.83$  mg/L of ethyl acetate,  $801.62 \pm 33.51$  mg/L of propyl acetate,  
127  $1,017.90 \pm 20.21$  mg/L of butyl acetate,  $1,210.40 \pm 24.83$  mg/L of isobutyl acetate,  $692.73 \pm 7.65$   
128 mg/L of isoamyl acetate, and  $1,177.98 \pm 45.72$  mg/L of benzyl acetate in ethanol, propanol,  
129 butanol, isobutanol, isoamyl alcohol, and benzyl alcohol doping, respectively. EcJW101 showed  
130 different alcohol substrate preference for the acetate ester biosynthesis in the following order:  
131 isobutanol > benzyl alcohol > butanol > propanol > isoamyl alcohol > ethanol (Supplementary  
132 Table S2).

133 Taken altogether, VAAT and ATF1 are the most suitable AATs for biosynthesis of lactate  
134 esters and acetate esters, respectively. Among the library of 12 esters (Fig. 1C), seven of these  
135 esters, including ethyl lactate, propyl lactate, butyl lactate, isobutyl lactate, isoamyl lactate, benzyl  
136 lactate, and benzyl acetate, were demonstrated for *in vivo* production in microbes for the first time.  
137 EcJW104 that harbors the pyruvate-to-lactate module with VAAT could produce 6 out of 6 target  
138 lactate esters including ethyl, propyl, butyl, isobutyl, isoamyl, and benzyl lactate. Since EcJW104  
139 achieved the highest titer of lactate esters in all cases, it was selected for establishing the  
140 biosynthesis pathway of lactate esters from glucose.

141

142 **Establishing the lactate ester biosynthesis pathways**

143 We next demonstrated direct fermentative production of lactate esters from glucose using  
144 the best VAAT candidate. We focused on the biosynthesis of ethyl and isobutyl lactate esters. We  
145 designed the biosynthesis pathways for ethyl and isobutyl lactate by combining the pyruvate-to-  
146 lactate ester module (pJW005) with the ethanol (pCT24) and isobutanol (pCT13) modules,  
147 respectively. By co-transforming pJW005/pCT24 and pJW005/pCT13 into the modular cell  
148 EcDL002, we generated the production strains, EcJW201 and EcJW202, for evaluating direct  
149 conversion of glucose to ethyl and isobutyl lactate esters.

150 We characterized EcJW201 and EcJW202 together with the parent strain, EcDL002, as a  
151 negative control in high-cell density cultures. The results show EcJW201 and EcJW202 produced  
152 ethyl (Fig. 2A) and isobutyl (Fig. 2B) lactate from glucose, respectively, while the negative control  
153 strain EcDL002 could not. Consistently, the expressions of metabolic enzymes of the ethyl and  
154 isobutyl lactate pathways were confirmed in EcJW201 and EcJW202, respectively, by SDS-PAGE  
155 analysis (Supplementary Figure S1). During 24 h fermentation, EcJW201 produced  $2.24 \pm 0.28$   
156 mg/L of ethyl lactate with a specific productivity of  $0.04 \pm 0.00$  mg/gDCW/h while EcJW202  
157 produced  $0.26 \pm 0.01$  mg/L of isobutyl lactate with a specific productivity of  $0.01 \pm 0.00$   
158 mg/gDCW/h. In addition to ethyl or isobutyl lactate biosynthesis, EcJW201 also produced  $92.25$   
159  $\pm 9.20$  mg/L of ethyl acetate while EcJW202 generated  $1.36 \pm 0.74$  mg/L of ethyl acetate and  $0.34$   
160  $\pm 0.07$  mg/L of isobutyl acetate (Supplementary Table S3A). Taken altogether, the direct microbial  
161 synthesis of lactate esters from fermentable sugar was successfully demonstrated. Since the lactate  
162 ester production was low, the next logical step was to identify and alleviate the key pathway  
163 bottlenecks for enhanced lactate ester biosynthesis. As proof-of-principle, we focused on  
164 optimization of the ethyl lactate production as presented in the subsequent sections.

165



## 166 **Identifying and alleviating key bottlenecks of the ethyl lactate biosynthesis pathway**

167 *Evaluating the biosynthesis of ethyl lactate in pH-controlled fermentation as a basis to*  
168 *identify potential pathway bottlenecks.* In an attempt to identify the key bottlenecks of the ethyl  
169 lactate biosynthesis pathway, we characterized EcJW201 in pH-controlled bioreactors. The results  
170 show that EcJW201 produced  $9.17 \pm 0.12$  mg/L of ethyl lactate with a specific productivity of  $0.15$   
171  $\pm 0.02$  mg/gDCW/h and a yield of  $0.19 \pm 0.00$  mg/g glucose (Fig. 2C, Supplementary Table S3B)  
172 in 18 h. Under pH-controlled fermentation, EcJW201 achieved 4.09-fold (from  $2.24 \pm 0.28$  to  $9.17$   
173  $\pm 0.12$  mg/L), 3.75-fold (from  $0.04 \pm 0.00$  to  $0.15 \pm 0.02$  mg/gDCW/h), and 19-fold (from  $0.01 \pm$   
174  $0.00$  to  $0.19 \pm 0.00$  mg/g glucose) improvement in titer, specific productivity, and yield,  
175 respectively, as compared to the strain performance in the high cell density culture. It is interesting  
176 to observe that ethyl acetate was first produced then consumed after 10 h, which is likely due to  
177 the endogenous esterase of *E. coli* as observed in a recent study [43]. Different from ethyl acetate,  
178 we did not observe ethyl lactate degradation during fermentation, especially after glucose was  
179 depleted. Even though the strain performance in pH-controlled bioreactors was enhanced by  
180 increased supply of precursor metabolites ( $19.35 \pm 0.29$  g/L of lactate and  $10.31 \pm 0.41$  g/L of  
181 ethanol, Supplementary Table S3B) from higher concentration of carbon source, the titer of ethyl  
182 lactate did not increase during the fermentation. This result suggests that (i) rate-limiting  
183 conversion of lactate into lactyl-CoA by Pct and/or condensation of lactyl-CoA with an ethanol by  
184 VAAT and/or (ii) toxicity of ethyl lactate on *E. coli* health might have limited lactate ester  
185 biosynthesis. Therefore, to enhance ethyl lactate production, it is important to elucidate and  
186 alleviate these identified potential bottlenecks.

187 *Ethyl lactate exhibited minimal toxicity on cell growth among lactate esters.* To  
188 determine whether lactate esters inhibited cell growth and hence contributed to low lactate ester

189 production, we cultured the parent strain, EcDL002, in a microplate reader with or without supply  
190 of various concentrations of lactate esters including ethyl, propyl, butyl, isobutyl, isoamyl, or  
191 benzyl lactate. The results show that ethyl lactate was the least toxic among the six lactate esters  
192 characterized where the growth rate ( $0.47 \pm 0.04$  1/h) and cell titer ( $OD = 0.42 \pm 0.03$ ) decreased  
193 by 6% and 10%, respectively, upon cell exposure to 5 g/L ethyl lactate. On the other hand, isoamyl  
194 lactate was the most toxic among the lactate esters, where cell exposure to only 0.5 g/L ester  
195 resulted in 18% and 15% reduction in the growth rate ( $0.41 \pm 0.02$  1/h) and OD ( $0.40 \pm 0.03$ ),  
196 respectively (Supplementary Figure S2A). The toxicity of lactate esters can be ranked in the  
197 following order: isoamyl lactate > benzyl lactate > butyl lactate > isobutyl lactate > propyl lactate  
198 > ethyl lactate. There existed a positive correlation between the logP values of lactate esters and  
199 their degrees of toxicity (Supplementary Figure S2B). This result was consistent with literature,  
200 illustrating that increasing toxicity of esters is highly correlated with increasing chain length of  
201 alcohol moieties that can severely disrupt cell membrane [44]. It should be note that since *E. coli*  
202 can effectively secrete short-chain esters [10], external exposure of cells to lactate esters in our  
203 experiment design is sufficient to probe the potential toxicity caused by endogenous production of  
204 these esters. Taken altogether, ethyl lactate is the least toxic and was not likely the main reason for  
205 the low production of ethyl lactate observed. It was likely the downstream pathway, responsible  
206 for conversion of lactate into lactyl-CoA by Pct and/or condensation of lactyl-CoA with ethanol  
207 by VAAT, might have been contributed to the inefficient ethyl lactate biosynthesis.

208 **Downstream pathway of the lactate ester biosynthesis is the key bottleneck.** To identify  
209 and alleviate the ethyl lactate biosynthesis pathway, we re-modularized it with two new parts: i)  
210 the upstream module carrying *ldhA*, *pdc*, and *adhB* for production of lactate and ethanol from sugar  
211 and ii) the downstream module carrying *pct* and *VAAT* for converting lactate into lactyl-CoA and

212 condensing lactyl-CoA and ethanol (Fig. 3A). We controlled metabolic fluxes of these modules  
213 by manipulating their plasmid copy numbers and levels of promoter induction with IPTG. By  
214 introducing the plasmids pJW007-015 into EcDL002, we generated the strains EcJW106-108 and  
215 EcJW203-208, respectively (Fig. 3B). To evaluate the performance of these constructed strains for  
216 ethyl lactate production, we characterized them in high cell density cultures induced with various  
217 concentrations of IPTG (0.01, 0.1, and 1.0 mM).

218 The results show that EcJW204, carrying the upstream module with a low copy number  
219 plasmid (P15A origin) and the downstream module with a high copy number plasmid (RSF1030  
220 origin) induced by 0.01 mM of IPTG, achieved the highest titer of ethyl lactate. As compared to  
221 EcJW201, EcJW204 achieved 4.96-fold (an increase from 2.24 to  $11.10 \pm 0.58$  mg/L), 5.50-fold  
222 (from  $0.04 \pm 0.00$  to  $0.22 \pm 0.02$  mg/gDCW/h), and 54.0-fold (from  $0.01 \pm 0.00$  to  $0.54 \pm 0.04$   
223 mg/g glucose) improvement in titer, specific productivity, and yield of ethyl lactate, respectively  
224 (Fig. 3B, Supplementary Table S5). Upon IPTG induction at 24 h, we observed the reduced cell  
225 growth of the host strains with use of high concentration of IPTG (Fig. 3C, Supplementary Table  
226 S4), suggesting that they suffered from metabolic burden due to overexpression of multiple  
227 enzymes [45] and also explaining why use of low concentration of IPTG can help yield better  
228 production of ethyl lactate.

229 Although EcJW204 showed better performance in ethyl lactate production than EcJW201,  
230 the accumulation of lactate and ethanol was still observed (Fig. 3F and 3G, Supplementary Table  
231 S4), indicating the pathway bottleneck remained. In particular, the downstream module flux was  
232 outcompeted by the upstream module flux and hence failed to turn over the precursor metabolites  
233 quickly enough. This result helps explain why a combination of the upstream module (for  
234 producing lactate and ethanol from sugar) with a low copy number plasmid and the downstream

235 module (for converting lactate into lactyl-CoA and condensing lactyl-CoA and ethanol) with a  
236 high copy number plasmid outperformed eight other combinations. Notably, the best ethyl lactate  
237 producer EcJW204 achieved the highest lactate and lowest ethanol production among the nine  
238 characterized strains (Fig. 3F and 3G, Supplementary Table S4), suggesting redistribution of the  
239 carbon flux from ethanol to lactate likely helped improve ethyl lactate production. Thus, we  
240 hypothesized that redistribution of the carbon source from ethanol to lactate would help to improve  
241 ethyl lactate production. To test this hypothesis, we first examined whether i) downregulation of  
242 the ethanol flux of the upstream module enabled redistribution of the carbon flow from ethanol to  
243 lactate and ii) this redistribution could improve ethyl lactate production before proceeding to  
244 investigate the potential bottleneck of downstream module.

245 **High ethanol synthesis of the upstream module was critical for ethyl lactate**  
246 **biosynthesis due to low specificity and activity of AAT.** To downregulate the ethanol flux of the  
247 upstream module, we first reconfigured pJW007, the upstream module of the best performer  
248 EcJW204, with a library of two weaker promoters and four weaker synthetic RBSs (Fig. 4A,  
249 Supplementary Figure S3A), resulting in four new upstream modules (pJW019-022). By  
250 introducing each newly constructed upstream module into EcDL002 together with the downstream  
251 module pJW012 used in EcJW204, we next generated the strains EcJW209-212 and characterized  
252 them in high cell density cultures induced with 0.01 mM IPTG.

253 The results show that while the carbon flux was successfully redistributed from ethanol to  
254 lactate, resulting in 5.97~6.92-fold decrease in ethanol production (from  $8.30 \pm 0.17$  to  $1.39 \pm 0.10$   
255  $\sim 1.20 \pm 0.01$  g/L) and 1.67~2.59-fold increase in lactate production (from  $1.06 \pm 0.09$  to  $1.77 \pm$   
256  $0.37$  g/L~ $2.75 \pm 0.09$  g/L) (Supplementary Table S6A), the ethyl lactate production was reduced  
257 by 7.99~11.81-fold in ethyl lactate production (from  $11.10 \pm 0.58$  to  $1.39 \pm 0.40 \sim 0.94 \pm 0.22$

258 mg/L) in all four characterized strains as compared to that of EcJW204 (Fig. 4B, Supplementary  
259 Table S6B). This result suggests that a high level of ethanol is critical for VAAT to produce ethyl  
260 lactate.

261 To support this conclusion, we evaluated the effect of external ethanol supply on  
262 production of ethyl esters in high cell density cultures of EcJW209-212 induced with 0.01 mM  
263 IPTG. Indeed, with external ethanol supply, we observed enhanced production of both ethyl lactate  
264 and ethyl acetate in EcJW209-212. Specifically, with addition of 2 g/L of ethanol, the ethyl lactate  
265 and ethyl acetate production increased by 2.27 ~ 3.33-fold (from  $1.39 \pm 0.40$  to  $3.15 \pm 0.15$  mg/L  
266 ~ from  $0.98 \pm 0.15$  to  $3.26 \pm 0.26$  mg/L) and 1.27~2.07-fold (from  $36.46 \pm 3.86$  to  $46.22 \pm 1.33$   
267 mg/L ~ from  $21.96 \pm 0.84$  to  $45.40 \pm 1.20$  mg/L), respectively (Supplementary Table S6). Further  
268 addition of ethanol up to 10 g/L improved the ethyl lactate and ethyl acetate production by  
269 3.78~5.26-fold (from  $1.39 \pm 0.40$  to  $5.26 \pm 0.27$  mg/L ~ from  $0.94 \pm 0.15$  mg/L to  $4.49 \pm 0.41$   
270 mg/L) and 4.09~6.92-fold (from  $36.46 \pm 3.86$  to  $148.97 \pm 3.80$  mg/L ~ from  $21.96 \pm 0.84$  mg/L to  
271  $151.87 \pm 2.34$  mg/L), respectively (Supplementary Table S6). Interestingly, while the total titer of  
272 ethyl esters increased with the increasing addition of ethanol (Fig. 5A), the proportion of ethyl  
273 lactate in the total ester slightly increased in the range of 3.2~7.0% (Fig. 5B), suggesting that  
274 VAAT prefers acetyl-CoA over lactyl-CoA with ethanol as a co-substrate. Notably, we observed  
275 a strong linear correlation between ethyl esters production and the amount of added ethanol (i.e.,  
276 for ethyl lactate,  $R^2 = 0.85\sim 0.94$ ; for ethyl acetate,  $R^2 = 0.99\sim 1.00$ ) (Supplementary Figure S4A).  
277 The results revealed that abundant availability of ethanol is essential to achieve high production of  
278 ethyl esters, indicating the main reason for the improved ethyl lactate production in EcJW204 was  
279 most likely due to the upregulation of downstream module with a high copy number plasmid.

280           **AAT was the most rate limiting step of the downstream module.** To determine whether  
281 Pct for conversion of lactate to lactyl-CoA or VAAT for condensation of lactyl-CoA and an alcohol  
282 was the most rate limiting step of the downstream module, we redesigned and constructed nine  
283 downstream modules (pJW027-035) derived from pJW012 of the best performer EcJW204 using  
284 a combination of three synthetic RBSs for Pct expression ( $\text{synRBS}_{\text{pct}\#1-3}$ ) and three synthetic RBSs  
285 for VAAT expression ( $\text{synRBS}_{\text{VAAT}\#1-3}$ ) (Fig. 4A, Supplementary Figure S3B). We introduced  
286 each newly constructed downstream module into EcDL002 together with the original upstream  
287 module (pJW007) used in EcJW204 to generate EcJW213-221. Then, we characterized the  
288 constructed strains in high cell density cultures induced with 0.01 mM IPTG.

289           The results show that the strains harboring the stronger RBSs for VAAT expression  
290 achieved the higher titers of ethyl lactate and ethyl acetate regardless of the RBS strengths for Pct  
291 expression (Fig. 4C, Supplementary Table S7). There is a strong linear correlation between ethyl  
292 ester production and the strength of RBS for VAAT expression (Supplementary Figure S4B). To  
293 further validate these results without the influence of the upstream module, we additionally  
294 constructed the strains EcJW109-117 by introducing nine individual downstream modules  
295 (pJW027-035) into EcDL002 and then characterized these strains in high cell density cultures with  
296 addition of 2 g/L of lactate, 2 g/L of ethanol, and 0.01 mM of IPTG. We could observe the same  
297 strong linear correlation between ethyl ester production and high VAAT expression without the  
298 upstream module (Fig. 5C).

299           Taken altogether, these results suggest that VAAT not Pct was the most rate limiting step  
300 of the downstream module of the ethyl lactate biosynthesis pathway. Specifically, a combination  
301 of low affinity towards lactyl-CoA and ethanol of VAAT contributed to low ethyl lactate  
302 biosynthesis. Further studies on discovery of novel AATs, exhibiting high activity towards lactyl-

303 CoA and alcohols but not acetyl-CoA, together with rational protein engineering of these enzymes  
304 would be warranted for improving lactate ester production.

305 In principle, the lactate ester platform can be controlled to produce enantiomers with broad  
306 industrial applications. Since the endogenous *E. coli* D-lactate dehydrogenase (LdhA) was  
307 overexpressed in the *ldhA*-deficient modular cell of our study, it is anticipated that D-(-)-lactate  
308 and the associated D-(-)-lactate esters were mainly produced. To date, production of optically pure  
309 D-(-)- [23] and L-(+)-form [26] of lactate from glucose in *E. coli* [25] has been well established.  
310 In addition, *pct* from *C. propionicum* [28] and *Megasphaera elsdenii* [29, 30] have been used for  
311 converting D-(-)-lactate into D-(-)-lactyl-CoA in polylactic acid (PLA) production in *E. coli* and  
312 their catalytic activity towards L-(+)-lactate has also been demonstrated [46, 47]. Thus, by  
313 combining stereospecific Ldh and Pct enzymes together with AATs, it is highly feasible to extend  
314 our lactate ester platform for microbial production of stereospecific lactate esters from renewable  
315 resources.

316

## 317 **CONCLUSIONS**

318 In this study, we have successfully developed a microbial lactate ester production platform  
319 and demonstrated for the first time the microbial biosynthesis of lactate esters directly from  
320 fermentable sugars in an *E. coli* modular cell. This study defines a cornerstone for the microbial  
321 production of lactate esters as green solvents from renewable resources with novel industrial  
322 applications.

323

## 324 **METHODS**

### 325 **Strain construction**

326 The list of strains used in this study are presented in Table 1. For molecular cloning, *E. coli*  
327 TOP10 strain was used. To generate the lactate ester production strains, the modules, including i)  
328 the pyruvate-to-lactate ester modules (pJW002-006), ii) the upstream and/or downstream modules  
329 (pJW007-pJW028), and iii) the alcohol modules (pCT24 or pCT13), were transformed into the  
330 engineered modular *E. coli* chassis cell, EcDL002 [10] via electroporation [48].

### 331 **Plasmid construction**

332 The list of plasmids and primers used in this study are presented in Table 2 and Table 3,  
333 respectively. Pathway construction includes pyruvate-to-lactate ester modules and a library of  
334 upstream and downstream modules with various plasmid copy numbers, promoters, and ribosome  
335 binding sites (RBSs).

336 ***Construction of pyruvate-to-lactate ester modules.*** A library of pyruvate-to-lactate ester  
337 modules with five divergent AATs were constructed to screen for an efficient AAT for production  
338 of lactate esters via two rounds of cloning. First, the pyruvate-to-lactyl-CoA module (pJW001)  
339 was constructed by assembling three DNA fragments: i) the *ldhA* gene, encoding D-lactate  
340 dehydrogenase, amplified from *E. coli* MG1655 genomic DNA using the primer pair  
341 DL\_0032/DL\_0033, ii) the *pct* gene, encoding propionate CoA-transferase, amplified from  
342 *Clostridium propionicum* genomic DNA using the primer pair DL\_0034/DL\_0035, and iii) the  
343 backbone amplified from pETite\* using the primer pair DL\_0001/DL\_0002 [49]. Then, the  
344 pyruvate-to-lactate ester modules (pJW002-006) were constructed by assembling three DNA  
345 fragments: i) the pyruvate-to-lactyl-CoA module amplified from pJW001 using the primer pair  
346 DL\_0032/DL\_0014, ii) the *ATF1* gene amplified from pDL004 for pJW002, the *ATF2* gene  
347 amplified from pDL005 for pJW003, the *SAAT* gene amplified from pDL001 for pJW004, the  
348 *VAAT* gene amplified from pDL006 for pJW005, or the *atfA* gene amplified from pCT16 for



349 pJW006, using the primer pair DL\_0015/DL\_0016, and iii) the backbone amplified from pETite\*  
350 using the primer pair DL\_0013/ DL\_0002. The genes *ATF1* and *ATF2* are originated from  
351 *Saccharomyces cerevisiae* [50], whereas the genes *SAAT*, *VAAT* and *atfA* are derived from  
352 *Fragaria ananassa* [51], *F. vesca* [52], and *Acinetobacter* sp. ADP1 [53], respectively.

353 ***Construction of a library of upstream and downstream modules with various plasmid***  
354 ***copy numbers.*** A library of upstream and downstream modules were constructed to improve ethyl  
355 lactate biosynthesis through a combinatorial pathway optimization strategy using three different  
356 plasmids: i) pACYCDuet-1 (P15A origin of replication), ii) pETDuet-1 (ColE1 origin), and iii)  
357 pRSFDuet-1 (RSF1030 origin), having the plasmid copy numbers of 10, 40, and 100, respectively  
358 [54].

359 The upstream modules (pJW007-009) were constructed by assembling three DNA  
360 fragments: i) the *ldhA* gene amplified from pJW001 using the primer pair JW\_0001/JW\_0002, ii)  
361 the ethanol module containing *pdhC* and *adhB* genes amplified from pCT24 using the primer pair  
362 JW\_0003/JW\_0004, and iii) the backbone amplified from pACYCDuet-1 for pJW007, from  
363 pETDuet-1 for pJW008, or from pRSFDuet-1 for pJW009 using the primer pair  
364 JW\_0005/JW\_0006.

365 The downstream modules (pJW010-012) were constructed by assembling three DNA  
366 fragments: i) the *pct* gene amplified from pJW001 using the primer pair JW\_0007/JW\_0008, ii)  
367 the *VAAT* gene amplified from pJW005 using the primer pair JW\_0009/JW\_0010, and iii) the  
368 backbone amplified from pACYCDuet-1 for pJW010, pETDuet-1 for pJW011, or pRSFDuet-1 for  
369 pJW012 using the primer pair JW\_0011/JW\_0012.

370 The combined upstream and downstream modules (pJW013-015) were constructed by  
371 assembling two DNA fragments: i) the upstream module amplified from pJW007 using the primer

372 pair JW\_0001/JW\_0004 and ii) the backbone containing the downstream module amplified from  
373 pJW010 for pJW013, pJW011 for pJW014, or pJW012 for pJW015 using the primer pair  
374 JW\_0005/JW\_0006.

375 ***Construction of a library of upstream and downstream modules with various promoters***  
376 ***and RBSs.*** For tighter regulation of biosynthetic pathway of ethyl lactate, we constructed the  
377 upstream and downstream modules with tunable promoters and RBSs.

378 The upstream modules (pJW019-022) were constructed via three rounds of cloning. First,  
379 the T7 terminator ( $T_{T7}$ ) was added between the multiple cloning site 1 (MCS1) and MCS2 of the  
380 pACYCDuet-1 backbone to create the first intermediate plasmid, pJW016, by assembling three  
381 DNA fragments: i) the *ldhA* gene amplified from pJW001 using the primer pair  
382 JW\_0013/JW\_0014, ii) the linker containing  $T_{T7}$  terminator amplified from pETite\* using the  
383 primer pair JW\_0015/JW\_0016, and iii) the backbone amplified from pACYCDuet-1 using the  
384 primer pair JW\_0017/JW\_0018. Next, the original T7 promoter ( $P_{T7}$ ) in MCS2 of pJW016 was  
385 replaced with the  $P_{AY1}$  (BBa\_J23100) promoter and  $P_{AY3}$  (BBaJ23108) promoter to generate two  
386 second intermediate plasmids, pJW017 and pJW018, respectively, by assembling two DNA  
387 fragments: i) the ethanol module amplified from pCT24 under the  $P_{AY1}$  promoter for pJW017 or  
388  $P_{AY3}$  promoter for pJW018 using the primer pair JW\_0019/JW\_0020 or JW\_0021/JW\_0020,  
389 respectively, and ii) the backbone amplified from pJW016 using the primer pair  
390 JW\_0022/JW\_0012 or JW\_0023/JW\_0012, respectively. Lastly, the final four synthetic operons  
391 (pJW019-022) were constructed by assembling two DNA fragments: i) the ethanol module  
392 amplified from pCT24 with the synthetic RBS sequences with predicted translation initiation rates  
393 of 0.33au for pJW019 and pJW021 and 0.03au for pJW020 and pJW022 using the primer pairs  
394 JW\_0024/JW\_0020, JW\_0025/JW\_0020, JW\_0026/JW\_0020, and JW\_0027/JW\_0020,

395 respectively, and ii) the backbone amplified from pJW017 for pJW019, pJW017 for pJW020,  
396 pJW018 for pJW021, and pJW018 for pJW022 using the primer pairs JW\_0028/JW\_0012,  
397 JW\_0029/JW\_0012, JW\_0030/JW\_0012, and JW\_0031/JW\_0012, respectively. The  $P_{AY1}$  and  $P_{AY3}$   
398 promoter sequences were obtained from the iGEM Anderson promoter library  
399 (<http://parts.igem.org/Promoters/Catalog/Anderson>) and the strength of promoters were assigned  
400 as  $P_{AY3} = 0.5 \times P_{AY1}$ . The RBS Calculator v2.0 [55, 56] was used to generate four synthetic RBS  
401 sequences with predicted translation initiation rates of 0.33 and 0.03 between the  $P_{AY1}$  (or  $P_{AY3}$ )  
402 promoter and *pdv* start codon (Fig. S3).

403 The downstream modules (pJW027-035) were constructed via three rounds of cloning.  
404 First, the  $T_{77}$  terminator was added between MCS1 and MCS2 of the pRSFDuet-1 backbone to  
405 generate the first intermediate plasmid, pJW023, by assembling three DNA fragments: i) the *pct*  
406 gene amplified from pJW001 using the primer pair JW\_0013/JW\_0032, ii) the linker containing  
407  $T_{77}$  terminator from pETite\* using the primer pair JW\_0033/JW\_0034, and iii) the backbone from  
408 pRSFDuet-1 using the primer pair JW\_0017/JW\_0018. Then, the original RBS in MCS1 of  
409 pJW023 was replaced with synthetic RBSs of various strengths to generate the second intermediate  
410 plasmids, pJW024-026, by assembling two DNA fragments: i) the *pct* gene amplified from  
411 pJW001 with the synthetic RBS sequences with predicted translation initiation rates at 90, 9000,  
412 or 90000au for pJW024, pJW025 or pJW026 using the primer pair JW\_0035/JW\_0036,  
413 JW\_0037/JW\_0036, or JW\_0038/JW\_0036, respectively, and ii) the backbone amplified from  
414 pJW023 using the primer pair JW\_0039/JW\_0040 for pJW024, JW\_0041/JW\_0040 for pJW025,  
415 or JW\_0042/JW\_0040 for pJW026, respectively. Lastly, the final nine downstream modules  
416 (pJW027-035) were constructed by assembling a combination of two DNA fragments: i) the *VAAT*  
417 gene amplified from pDL006 with the synthetic RBS sequences predicted with translation

418 initiation rates of 90, 9000, or 90000au for pJW027/pJW030/pJW033, pJW028/pJW031/pJW034,  
419 or pJW029/pJW032/pJW035 using the primer pair JW\_0043/JW\_0010, JW\_0044/JW\_0010, or  
420 JW\_0045/JW\_0010, respectively, and ii) the backbone amplified from pJW024, pJW025, or  
421 pJW026 for pJW027-029, pJW030-032, or pJW033-035 using the primer pair  
422 JW\_0046/JW\_0012, JW\_0047/JW\_0012 or JW\_0048/JW\_0012, respectively. The RBS  
423 Calculator v2.0 [55, 56] was used to generate six synthetic RBS sequences with predicted  
424 translation initiation rates of 90, 9000, and 90000au between the P<sub>T7</sub> promoter and *pct* (or *VAAT*)  
425 start codon (Fig. S3).

## 426 **Culture media and conditions**

427 ***Culture media.*** For molecular cloning, seed cultures, and protein expression analysis, the  
428 Luria-Bertani (LB) medium, comprising of 10 g/L peptone, 5 g/L yeast extract, and 5 g/L NaCl,  
429 was used. For high-cell density cultures, pre-cultures of bioreactor batch fermentations, and growth  
430 inhibition analysis of lactate esters, the M9 hybrid medium [10] with 20 g/L glucose was used. For  
431 bioreactor batch fermentations, the M9 hybrid medium with 50 g/L glucose and 100  $\mu$ L of  
432 antifoam (Antifoam 204, Sigma-Aldrich, MO, USA) was used. 30  $\mu$ g/mL chloramphenicol (cm),  
433 50  $\mu$ g/mL kanamycin (kan), and/or 50  $\mu$ g/mL ampicillin (amp) was added to the media for  
434 selection where applicable.

435 ***High-cell density cultures.*** For seed cultures, 2% (v/v) of stock cells were grown overnight  
436 in 5 mL of LB with appropriate antibiotics. For pre-cultures, 1% (v/v) of seed cultures were  
437 transferred into 100 mL of LB medium in 500 mL baffled flasks. For main cultures, pre-cultures  
438 were aerobically grown overnight (at 37°C, 200 rpm), centrifuged (4700 rpm, 10 min), and  
439 resuspended to yield an optical density measured at 600nm (OD<sub>600nm</sub>) of 3 in M9 hybrid medium  
440 containing appropriate concentration of isopropyl-beta-D-thiogalactopyranoside (IPTG) and

441 antibiotics. The resuspended cultures were distributed into 15 mL polypropylene centrifuge tubes  
442 (Thermo Scientific, IL, USA) with a working volume of 5 mL and grown for 24 hour (h) on a 75°  
443 angled platform in a New Brunswick Excella E25 at 37°C, 200 rpm. The tubes were capped to  
444 generate anaerobic condition. All high-cell density culture studies were performed in biological  
445 triplicates.

446 ***pH-Controlled bioreactor batch fermentations.*** pH-Controlled bioreactor batch  
447 fermentations were conducted with a Biostat B+ (Sartorius Stedim, NY, USA) dual 1.5 L  
448 fermentation system at a working volume of 1 L M9 hybrid medium. The seed and pre-cultures  
449 were prepared as described in high-cell density cultures in LB and M9 hybrid media, respectively.  
450 For main cultures, 10% (v/v) of pre-cultures were inoculated into fermentation cultures. During  
451 the fermentation, to achieve high cell density, dual-phase fermentation approach [25, 57], aerobic  
452 cell growth phase followed by anaerobic production phase, was applied. For the first aerobic phase,  
453 the temperature, agitation, and air flow rate were maintained at 37°C, 1000 rpm, and 1  
454 volume/volume/min (vvm) for 4 h, respectively. Then, the oxygen in the medium was purged by  
455 sparing nitrogen gas at 2 vvm for 2 h to generate anaerobic condition. For the subsequent anaerobic  
456 phase, 0.5 mM of IPTG was added to induce the protein expression, and the culture temperature  
457 and nitrogen flow rate were maintained at 30°C and 0.2 vvm, respectively. During the  
458 fermentation, the pH was maintained at 7.0 with 5 M KOH and 40% H<sub>3</sub>PO<sub>4</sub>. Bioreactor batch  
459 fermentation studies were performed in biological duplicates.

460 ***Growth inhibition analysis of lactate esters.*** Seed cultures of EcDL002 were prepared as  
461 described in high-cell density cultures. 4 % (v/v) of seed cultures were inoculated into 100 µL of  
462 the M9 hybrid media, containing various concentrations (0.5~40 g/L) of lactate esters including  
463 ethyl-, propyl-, butyl-, isobutyl-, isoamyl-, or benzyl lactate, in a 96-well microplate. Then, the

464 microplate was sealed with a plastic adhesive sealing film, SealPlate® (EXCEL Scientific, Inc.,  
465 CA, USA) to prevent evaporation of lactate esters and incubated at 37°C with continuous shaking  
466 using a BioTek Synergy HT microplate reader (BioTek Instruments, Inc., VT, USA). OD<sub>600nm</sub> was  
467 measured at 20 min intervals. Growth inhibition studies of lactate esters were performed twice in  
468 biological triplicates ( $n = 6$ ).

#### 469 **Protein expression and SDS-PAGE analysis**

470 Seed cultures were prepared as described in high-cell density cultures. 1% (v/v) of seed  
471 cultures subsequently inoculated in 500 mL baffled flasks containing 100 ml of LB medium. Cells  
472 were aerobically grown at 37°C and 200 rpm and induced at an OD<sub>600nm</sub> of 0.6~0.8 with 0.5 mM  
473 of IPTG. After 4 h of induction, cells were collected by centrifugation and resuspended in 100 mM  
474 of sodium phosphate buffer (pH7.0) at the final OD<sub>600nm</sub> of 10. Cell pellets were disrupted using a  
475 probe-type sonicator (Model 120, Fisher Scientific, NH, USA) on ice-water mixture. The resulting  
476 crude extracts were mixed with 6x sodium dodecyl sulfate (SDS) sample buffer, heated at 100°C  
477 for 5 min, and then analyzed by SDS-polyacrylamide gel electrophoresis (SDS-PAGE, 14%  
478 polyacrylamide gel). Protein bands were visualized with Coomassie Brilliant Blue staining.

#### 479 **Analytical methods**

480 *Determination of cell concentrations.* The optical density was measured at 600 nm using  
481 a spectrophotometer (GENESYS 30, Thermo Scientific, IL, USA). The dry cell mass was obtained  
482 by multiplication of the optical density of culture broth with a pre-determined conversion factor,  
483 0.48 g/L/OD.

484 *High performance liquid chromatography (HPLC).* Glucose, lactate, acetate, ethanol,  
485 isobutanol, isoamyl alcohol, and benzyl alcohol were quantified by using the Shimadzu HPLC  
486 system (Shimadzu Inc., MD, USA) equipped with the Aminex HPX-87H cation exchange column

487 (BioRad Inc., CA, USA) heated at 50°C. A mobile phase of 10 mN H<sub>2</sub>SO<sub>4</sub> was used at a flow rate  
488 of 0.6 mL/min. Detection was made with the reflective index detector (RID) and UV detector  
489 (UVD) at 220 nm.

490 ***Gas chromatography coupled with mass spectroscopy (GC/MS).*** All esters were  
491 quantified by GC/MS. For GC/MS analysis, analytes in the supernatants were extracted with  
492 dichloromethane (DCM), containing pentanol as an internal standard, in a 1:1 (v/v) ratio for 1 h at  
493 37°C, 200 rpm in 15 mL polypropylene centrifuge tubes. After extraction, supernatant-DCM  
494 mixtures were centrifuged and 5 µL of DCM extracts were injected into a gas chromatograph (GC)  
495 HP 6890 equipped with the mass selective detector (MS) HP 5973. For the GC system, helium  
496 was used as the carrier gas at a flow rate of 0.5 mL/min and the analytes were separated on a  
497 Phenomenex ZB-5 capillary column (30 m x 0.25 mm x 0.25 µm). The oven temperature was  
498 programmed with an initial temperature of 50°C with a 1°C/min ramp up to 58°C. Next a 25°C/min  
499 ramp was deployed to 235°C and then finally held a temperature of 300°C for 2 minutes to elute  
500 any residual non-desired analytes. The injection was performed using a splitless mode with an  
501 initial injector temperature of 280°C. For the MS system, a selected ion monitoring (SIM) mode  
502 was deployed to detect analytes.

503 The SIM parameters for detecting lactate esters were as follows: i) for pentanol, ions 53.00,  
504 60.00, and 69.00 detected from 5.00 to 7.70 min, ii) for ethyl lactate, ions 46.00, 47.00, and 75.00  
505 detected from 7.70 to 10.10 min, iii) for propyl lactate, ions 59.00, 88.00, and 89.00 detected from  
506 10.10 to 11.00 min, iv) for isobutyl lactate, ions 56.00, 57.00, and 59.00 detected from 11.00 to  
507 11.60 min, v) for butyl lactate, ions 75.00, 91.00, and 101.00 detected from 11.60 to 12.30 min,  
508 vi) for isoamyl lactate, ions 46.00, 73.00, 75.00 from 12.30 to 14.50 min, and vii) for benzyl lactate,  
509 ions 45.00, 91.00, and 180.00 from 14.50 to 15.08 min. The SIM parameters for detecting acetate

510 esters were as follows: i) for ethyl acetate, ions 45.00, 61.00, and 70.00 detected from 4.22 to 5.35  
511 min, ii) for propyl acetate, ions 57.00, 59.00, and 73.00 detected from 5.35 to 6.40 min, iii) for  
512 pentanol, ions 53.00, 60.00, and 69.00 detected from 6.40 to 6.60 min, iv) for isobutyl acetate, ions  
513 56.00, 61.00, and 73.00 detected from 6.60 to 7.70 min, v) for butyl acetate, ions 57.00, 71.00, and  
514 87.00 detected from 7.70 to 9.45 min, vi) for isoamyl acetate, ions 58.00, 70.00, and 88.00 detected  
515 from 9.45 to 13.10 min, and vii) for benzyl acetate, ions 63.00, 107.00, and 150.00 from 13.10 to  
516 15.82 min.

517 **Statistics.** Statistical analysis was performed with SigmaPlot v.14 using the two-tailed  
518 unpaired Student's t-test.

519

## 520 **ABBREVIATIONS**

521 **LdhA:** lactate dehydrogenase; **Pct:** propionate CoA-transferase; **AAT:** alcohol acyltransferase;  
522 **ATF1:** alcohol acyltransferase from *Saccharomyces cerevisiae*; **ATF2:** alcohol acyltransferase  
523 from *Saccharomyces cerevisiae*; **SAAT:** alcohol acyltransferase from *Fragaria ananassa*; **VAAT:**  
524 alcohol acyltransferase from *Fragaria vesca*; **AtfA:** alcohol acyltransferase from *Acinetobacter*  
525 sp. ADP1; **OD:** optical density; **DCW:** dry cell weight; **SDS-PAGE:** sodium dodecyl sulfate-  
526 polyacrylamide gel electrophoresis; **IPTG:** isopropyl  $\beta$ -D-thiogalactopyranoside; **MCS:** multi  
527 cloning site; **RBS:** ribosome binding site; **au:** arbitrary unit; **HPLC:** high-performance liquid  
528 chromatography; **GC/MS:** gas chromatography coupled with mass spectrometry; **SIM:** selected  
529 ion monitoring; **DCM:** dichloromethane; **rpm:** revolutions per minute; **v/v:** volume per volume;  
530 **vvm:** volume per volume per minute.

531

## 532 **AUTHOR'S CONTRIBUTIONS**



533 CTT conceived and supervised this study. JWL and CTT designed the experiments, analyzed the  
534 data, and drafted the manuscript. JWL performed the experiments. Both authors read and approved  
535 the final manuscript.

#### 536 **ACKNOWLEDGMENTS**

537 The authors would like to thank the Center of Environmental Biotechnology at UTK for using the  
538 GC/MS instrument.

539

#### 540 **COMPETING INTERESTS**

541 The authors declare that they have no competing interests.

542

#### 543 **AVAILABILITY OF SUPPORTING DATA**

544 Additional files 1 and 2 contain supporting data

545

#### 546 **CONSENT FOR PUBLICATION**

547 All the authors consent for publication.

548

#### 549 **ETHICAL APPROVAL AND CONSENT TO PARTICIPATE**

550 Not applicable

551

#### 552 **FUNDING**

553 This research was financially supported in part by the NSF CAREER award (NSF#1553250) and  
554 both the BioEnergy Science Center (BESC) and Center for Bioenergy Innovation (CBI), the U.S.

555 Department of Energy (DOE) Bioenergy Research Centers funded by the Office of Biological and

556 Environmental Research in the DOE Office of Science.

557

## 558 REFERENCES

- 559 1. Kerton FM: **Alternative solvents for green chemistry**. Cambridge, UK: RSC Pub.; 2009.
- 560 2. Lancaster M: **Green Chemistry : An Introductory Text**. *Royal Society of Chemistry*  
561 2002.
- 562 3. Aparicio S, Halajian S, Alcalde R, Garcia B, Leal JM: **Liquid structure of ethyl lactate,**  
563 **pure and water mixed, as seen by dielectric spectroscopy, solvatochromic and**  
564 **thermophysical studies**. *Chem Phys Lett* 2008, **454**(1-3):49-55.
- 565 4. Paul. S, Pradhan. K, Das. AR: **Ethyl Lactate As a Green Solvent: A Promising Bio-**  
566 **compatible Media for Organic Synthesis**. *Current Green Chemistry* 2016.
- 567 5. Weissermel K, Arpe H-J: **Industrial Organic Chemistry**, 3rd edn: VCH Publishers Inc.;  
568 1997.
- 569 6. Pereira CSM, Silva VMTM, Rodrigues AE: **Ethyl lactate as a solvent: Properties,**  
570 **applications and production processes - a review**. *Green Chem* 2011, **13**(10):2658-2671.
- 571 7. Bidy. MJ, Scarlata. C, Kinchin. C: **Chemicals from Biomass: A Market Assessment of**  
572 **Bioproducts with Near-Term Potential**. In. National Renewable Energy Laboratory;  
573 2016.
- 574 8. Gao C, Ma CQ, Xu P: **Biotechnological routes based on lactic acid production from**  
575 **biomass**. *Biotechnol Adv* 2011, **29**(6):930-939.
- 576 9. Hasegawa S, Azuma M, Takahashi K: **Stabilization of enzyme activity during the**  
577 **esterification of lactic acid in hydrophobic ethers and ketones as reaction media that**  
578 **are miscible with lactic acid despite their high hydrophobicity**. *Enzyme Microb Tech*  
579 2008, **43**(3):309-316.

- 580 10. Layton DS, Trinh CT: **Engineering modular ester fermentative pathways in**  
581 **Escherichia coli.** *Metab Eng* 2014, **26**:77-88.
- 582 11. Rodriguez GM, Tashiro Y, Atsumi S: **Expanding ester biosynthesis in Escherichia coli.**  
583 *Nat Chem Biol* 2014, **10**(4):259-+.
- 584 12. Tai YS, Xiong MY, Zhang KC: **Engineered biosynthesis of medium-chain esters in**  
585 **Escherichia coli.** *Metab Eng* 2015, **27**:20-28.
- 586 13. Layton DS, Trinh CT: **Expanding the Modular Ester Fermentative Pathways for**  
587 **Combinatorial Biosynthesis of Esters From Volatile Organic Acids.** *Biotechnol Bioeng*  
588 2016, **113**(8):1764-1776.
- 589 14. Wang J, Mahajani M, Jackson SL, Yang YP, Chen MY, Ferreira EM, Lin YH, Yan YJ:  
590 **Engineering a bacterial platform for total biosynthesis of caffeic acid derived**  
591 **phenethyl esters and amides.** *Metab Eng* 2017, **44**:89-99.
- 592 15. Kruis AJ, Levisson M, Mars AE, van der Ploeg M, Daza FG, Ellena V, Kengen SWM, van  
593 der Oost J, Weusthuis RA: **Ethyl acetate production by the elusive alcohol**  
594 **acetyltransferase from yeast.** *Metab Eng* 2017, **41**:92-101.
- 595 16. Layton DS, Trinh CT: **Microbial synthesis of a branched-chain ester platform from**  
596 **organic waste carboxylates.** *Metabolic Engineering Communications* 2016, **3**:245-251.
- 597 17. Guo DY, Pan H, Li X: **Metabolic engineering of Escherichia coli for production of**  
598 **biodiesel from fatty alcohols and acetyl-CoA.** *Appl Microbiol Biot* 2015, **99**(18):7805-  
599 7812.
- 600 18. Guo DY, Zhang LH, Kong SJ, Liu ZJ, Li X, Pan H: **Metabolic Engineering of**  
601 **Escherichia coli for Production of 2-Phenylethanol and 2-Phenylethyl Acetate from**  
602 **Glucose.** *J Agr Food Chem* 2018, **66**(23):5886-5891.

- 603 19. Liu ZJ, Zong Z, Chen ZJ, Xu QY, Shi Y, Li DS, Pan H, Guo DY: **De novo biosynthesis**  
604 **of antimycobacterial agent geranylgeranyl acetate from glucose.** *Biochem Eng J* 2019,  
605 **142**:84-88.
- 606 20. Wu T, Li S, Zhang B, Bi C, Zhang X: **Engineering *Saccharomyces cerevisiae* for the**  
607 **production of the valuable monoterpene ester geranyl acetate.** *Microb Cell Fact* 2018,  
608 **17**(1):85.
- 609 21. Chacon MG, Marriott A, Kendrick EG, Styles MQ, Leak DJ: **Esterification of geraniol**  
610 **as a strategy for increasing product titre and specificity in engineered *Escherichia***  
611 ***coli*.** *Microb Cell Fact* 2019, **18**.
- 612 22. Guo DY, Kong SJ, Zhang LH, Pan H, Wang C, Liu ZJ: **Biosynthesis of advanced biofuel**  
613 **farnesyl acetate using engineered *Escherichia coli*.** *Bioresource Technol* 2018, **269**:577-  
614 580.
- 615 23. Zhou S, Causey TB, Hasona A, Shanmugam KT, Ingram LO: **Production of optically**  
616 **pure D-lactic acid in mineral salts medium by metabolically engineered *Escherichia***  
617 ***coli* W3110.** *Appl Environ Microbiol* 2003, **69**(1):399-407.
- 618 24. Liu H, Kang J, Qi Q, Chen G: **Production of lactate in *Escherichia coli* by redox**  
619 **regulation genetically and physiologically.** *Appl Biochem Biotechnol* 2011, **164**(2):162-  
620 169.
- 621 25. Chang DE, Jung HC, Rhee JS, Pan JG: **Homofermentative production of D- or L-lactate**  
622 **in metabolically engineered *Escherichia coli* RR1.** *Appl Environ Microbiol* 1999,  
623 **65**(4):1384-1389.

- 624 26. Niu DD, Tian KM, Prior BA, Wang M, Wang ZX, Lu FP, Singh S: **Highly efficient L-**  
625 **lactate production using engineered Escherichia coli with dissimilar temperature**  
626 **optima for L-lactate formation and cell growth.** *Microb Cell Fact* 2014, **13**.
- 627 27. Chen XZ, Tian KM, Niu DD, Shen W, Algasan G, Singh S, Wang ZX: **Efficient**  
628 **bioconversion of crude glycerol from biodiesel to optically pure D-lactate by**  
629 **metabolically engineered Escherichia coli.** *Green Chem* 2014, **16**(1):342-350.
- 630 28. Cho JH, Park SJ, Lee SY, Jung YK: **Cells or plants that can produce polylactate or its**  
631 **copolymers and to a method for preparing polylactate or its copolymers using the**  
632 **same.** In.; 2006.
- 633 29. Taguchi S, Yamadaa M, Matsumoto K, Tajima K, Satoh Y, Munekata M, Ohno K, Kohda  
634 K, Shimamura T, Kambe H *et al*: **A microbial factory for lactate-based polyesters using**  
635 **a lactate-polymerizing enzyme.** *P Natl Acad Sci USA* 2008, **105**(45):17323-17327.
- 636 30. Matsumoto K, Tobitani K, Aoki S, Song Y, Ooi T, Taguchi S: **Improved production of**  
637 **poly(lactic acid)-like polyester based on metabolite analysis to address the rate-**  
638 **limiting step.** *Amb Express* 2014, **4**.
- 639 31. Ingram LO, Conway T, Clark DP, Sewell GW, Preston JF: **Genetic-Engineering of**  
640 **Ethanol-Production in Escherichia-Coli.** *Appl Environ Microb* 1987, **53**(10):2420-2425.
- 641 32. Trinh CT, Unrean P, Srienc F: **Minimal Escherichia coli cell for the most efficient**  
642 **production of ethanol from hexoses and pentoses.** *Appl Environ Microb* 2008,  
643 **74**(12):3634-3643.
- 644 33. Choi YJ, Park JH, Kim TY, Lee SY: **Metabolic engineering of Escherichia coli for the**  
645 **production of 1-propanol.** *Metab Eng* 2012, **14**(5):477-486.

- 646 34. Hanai T, Atsumi S, Liao JC: **Engineered synthetic pathway for isopropanol production**  
647 **in Escherichia coli.** *Appl Environ Microb* 2007, **73**(24):7814-7818.
- 648 35. Atsumi S, Cann AF, Connor MR, Shen CR, Smith KM, Brynildsen MP, Chou KJY, Hanai  
649 T, Liao JC: **Metabolic engineering of Escherichia coli for 1-butanol production.** *Metab*  
650 *Eng* 2008, **10**(6):305-311.
- 651 36. Atsumi S, Wu TY, Eckl EM, Hawkins SD, Buelter T, Liao JC: **Engineering the**  
652 **isobutanol biosynthetic pathway in Escherichia coli by comparison of three aldehyde**  
653 **reductase/alcohol dehydrogenase genes.** *Appl Microbiol Biot* 2010, **85**(3):651-657.
- 654 37. Tseng HC, Prather KLJ: **Controlled biosynthesis of odd-chain fuels and chemicals via**  
655 **engineered modular metabolic pathways.** *P Natl Acad Sci USA* 2012, **109**(44):17925-  
656 17930.
- 657 38. Connor MR, Liao JC: **Engineering of an Escherichia coli strain for the production of**  
658 **3-methyl-1-butanol.** *Appl Environ Microb* 2008, **74**(18):5769-5775.
- 659 39. Pugh S, McKenna R, Halloum I, Nielsen DR: **Engineering Escherichia coli for**  
660 **renewable benzyl alcohol production.** *Metabolic Engineering Communications* 2015,  
661 **2**:39-45.
- 662 40. Sekar BS, Lukito BR, Li Z: **Production of Natural 2-Phenylethanol from Glucose or**  
663 **Glycerol with Coupled Escherichia coli Strains Expressing L-Phenylalanine**  
664 **Biosynthesis Pathway and Artificial Biocascades.** *Acs Sustain Chem Eng* 2019,  
665 **7**(14):12231-12239.
- 666 41. Kim TY, Lee SW, Oh MK: **Biosynthesis of 2-phenylethanol from glucose with**  
667 **genetically engineered Kluyveromyces marxianus.** *Enzyme Microb Tech* 2014, **61**-  
668 **62**:44-47.

- 669 42. Stoveken T, Kalscheuer R, Malkus U, Reichelt R, Steinbuchel A: **The wax ester**  
670 **synthase/acyl coenzyme A:diacylglycerol acyltransferase from Acinetobacter sp.**  
671 **strain ADP1: characterization of a novel type of acyltransferase.** *J Bacteriol* 2005,  
672 **187(4):1369-1376.**
- 673 43. Kruis AJ, Levisson M, Mars AE, van der Ploeg M, Garces Daza F, Ellena V, Kengen  
674 SWM, van der Oost J, Weusthuis RA: **Ethyl acetate production by the elusive alcohol**  
675 **acetyltransferase from yeast.** *Metab Eng* 2017, **41:92-101.**
- 676 44. Wilbanks B, Trinh CT: **Comprehensive characterization of toxicity of fermentative**  
677 **metabolites on microbial growth.** *Biotechnology for Biofuels* 2017, **10(1):262.**
- 678 45. Wu G, Yan Q, Jones JA, Tang YJJ, Fong SS, Koffas MAG: **Metabolic Burden:**  
679 **Cornerstones in Synthetic Biology and Metabolic Engineering Applications.** *Trends*  
680 *Biotechnol* 2016, **34(8):652-664.**
- 681 46. Schweiger G, Buckel W: **On the Dehydration of (R)-Lactate in the Fermentation of**  
682 **Alanine to Propionate by Clostridium-Propionicum.** *Febs Lett* 1984, **171(1):79-84.**
- 683 47. Niu W, Guo J: **Stereospecific microbial conversion of lactic acid into 1,2-propanediol.**  
684 *ACS Synth Biol* 2015, **4(4):378-382.**
- 685 48. Green. MR, Sambrook J: **Molecular Cloning.** In: *A Laboratory Manual.* Cold Spring  
686 Harbor Laboratory Press, United States; 2001.
- 687 49. Gibson D, Young L, Chuang R, Venter J, Hutchison C, Smith H: **Enzymatic assembly of**  
688 **DNA molecules up to several hundred kilobases.** *Nat Methods* 2009, **6:343 - 345.**
- 689 50. Verstrepen KJ, Van Laere SDM, Vanderhaegen BMP, Derdelinckx G, Dufour JP, Pretorius  
690 IS, Winderickx J, Thevelein JM, Delvaux FR: **Expression levels of the yeast alcohol**



- 691            **acetyltransferase genes ATF1, Lg-ATF1, and ATF2 control the formation of a broad**  
692            **range of volatile esters.** *Appl Environ Microb* 2003, **69**(9):5228-5237.
- 693    51.    Aharoni A, Keizer LCP, Bouwmeester HJ, Sun Z, Alvarez-Huerta M, Verhoeven HA,  
694            Blaas J, van Houwelingen AMML, De Vos RCH, van der Voet H *et al*: **Identification of**  
695            **the SAAT Gene Involved in Strawberry Flavor Biogenesis by Use of DNA**  
696            **Microarrays.** *Plant Cell* 2000, **12**(5):647-662.
- 697    52.    Beekwilder J, Alvarez-Huerta M, Neef E, Verstappen FW, Bouwmeester HJ, Aharoni A:  
698            **Functional characterization of enzymes forming volatile esters from strawberry and**  
699            **banana.** *Plant Physiol* 2004, **135**(4):1865-1878.
- 700    53.    Shi S, Valle-Rodriguez JO, Khoomrung S, Siewers V, Nielsen J: **Functional expression**  
701            **and characterization of five wax ester synthases in *Saccharomyces cerevisiae* and**  
702            **their utility for biodiesel production.** *Biotechnol Biofuels* 2012, **5**:7.
- 703    54.    Wu JJ, Du GC, Zhou JW, Chen J: **Metabolic engineering of *Escherichia coli* for (2S)-**  
704            **pinocembrin production from glucose by a modular metabolic strategy.** *Metab Eng*  
705            2013, **16**:48-55.
- 706    55.    Borujeni AE, Channarasappa AS, Salis HM: **Translation rate is controlled by coupled**  
707            **trade-offs between site accessibility, selective RNA unfolding and sliding at upstream**  
708            **standby sites.** *Nucleic Acids Res* 2014, **42**(4):2646-2659.
- 709    56.    Salis HM, Mirsky EA, Voigt CA: **Automated design of synthetic ribosome binding sites**  
710            **to control protein expression.** *Nat Biotechnol* 2009, **27**(10):946-U112.
- 711    57.    Zhu Y, Eiteman MA, DeWitt K, Altman E: **Homolactate fermentation by metabolically**  
712            **engineered *Escherichia coli* strains.** *Appl Environ Microbiol* 2007, **73**(2):456-464.

- 713 58. Trinh CT, Li J, Blanch HW, Clark DS: **Redesigning Escherichia coli metabolism for**  
714 **anaerobic production of isobutanol.** *Appl Environ Microbiol* 2011, **77**(14):4894-4904.
- 715 59. Wierzbicki M, Niraula N, Yarrabothula A, Layton DS, Trinh CT: **Engineering an**  
716 **Escherichia coli platform to synthesize designer biodiesels.** *J Biotechnol* 2016, **224**:27-  
717 34.
- 718

719 **Table 1.** A list of strains used in this study

| Strains                        | Genotypes                                                                                                                                                                                                                             | Sources    |
|--------------------------------|---------------------------------------------------------------------------------------------------------------------------------------------------------------------------------------------------------------------------------------|------------|
| <i>E. coli</i> TOP10           | F <sup>-</sup> <i>mcrA</i> $\Delta$ ( <i>mrr-hsdRMS-mcrBC</i> ) $\Phi$ 80 <i>lacZ</i> $\Delta$ M15 $\Delta$ <i>lacX74</i> <i>recA1</i> <i>araD139</i> $\Delta$ ( <i>ara leu</i> ) 7697 <i>galU galK rpsL</i> (StrR) <i>endA1 nupG</i> | Invitrogen |
| <i>E. coli</i> MG1655          | F <sup>-</sup> $\lambda$ <sup>-</sup>                                                                                                                                                                                                 | ATCC 47076 |
| <i>Clostridium propionicum</i> | Wildtype                                                                                                                                                                                                                              | ATCC 25522 |
| EcDL002                        | TCS083 ( $\lambda$ DE3) $\Delta$ <i>fadE</i>                                                                                                                                                                                          | [10]       |
| EcJW101                        | EcDL002/pJW002; amp <sup>R</sup>                                                                                                                                                                                                      | This study |
| EcJW102                        | EcDL002/pJW003; amp <sup>R</sup>                                                                                                                                                                                                      | This study |
| EcJW103                        | EcDL002/pJW004; amp <sup>R</sup>                                                                                                                                                                                                      | This study |
| EcJW104                        | EcDL002/pJW005; amp <sup>R</sup>                                                                                                                                                                                                      | This study |
| EcJW105                        | EcDL002/pJW006; amp <sup>R</sup>                                                                                                                                                                                                      | This study |
| EcJW201                        | EcDL002/pJW005 pCT24; amp <sup>R</sup> kan <sup>R</sup>                                                                                                                                                                               | This study |
| EcJW202                        | EcDL002/pJW005 pCT13; amp <sup>R</sup> kan <sup>R</sup>                                                                                                                                                                               | This study |
| EcJW106                        | EcDL002/pJW013; cm <sup>R</sup>                                                                                                                                                                                                       | This study |
| EcJW203                        | EcDL002/pJW007 pJW011; cm <sup>R</sup> amp <sup>R</sup>                                                                                                                                                                               | This study |
| EcJW204                        | EcDL002/pJW007 pJW012; cm <sup>R</sup> kan <sup>R</sup>                                                                                                                                                                               | This study |
| EcJW205                        | EcDL002/pJW008 pJW010; cm <sup>R</sup> amp <sup>R</sup>                                                                                                                                                                               | This study |
| EcJW107                        | EcDL002/pJW014; amp <sup>R</sup>                                                                                                                                                                                                      | This study |
| EcJW206                        | EcDL002/pJW008 pJW012; amp <sup>R</sup> kan <sup>R</sup>                                                                                                                                                                              | This study |
| EcJW207                        | EcDL002/pJW009 pJW010; cm <sup>R</sup> kan <sup>R</sup>                                                                                                                                                                               | This study |
| EcJW208                        | EcDL002/pJW009 pJW011; amp <sup>R</sup> kan <sup>R</sup>                                                                                                                                                                              | This study |
| EcJW108                        | EcDL002/pJW015; kan <sup>R</sup>                                                                                                                                                                                                      | This study |
| EcJW209                        | EcDL002/pJW019 pJW012; cm <sup>R</sup> kan <sup>R</sup>                                                                                                                                                                               | This study |
| EcJW210                        | EcDL002/pJW020 pJW012; cm <sup>R</sup> kan <sup>R</sup>                                                                                                                                                                               | This study |
| EcJW211                        | EcDL002/pJW021 pJW012; cm <sup>R</sup> kan <sup>R</sup>                                                                                                                                                                               | This study |
| EcJW212                        | EcDL002/pJW022 pJW012; cm <sup>R</sup> kan <sup>R</sup>                                                                                                                                                                               | This study |
| EcJW213                        | EcDL002/pJW007 pJW027; cm <sup>R</sup> kan <sup>R</sup>                                                                                                                                                                               | This study |
| EcJW214                        | EcDL002/pJW007 pJW028; cm <sup>R</sup> kan <sup>R</sup>                                                                                                                                                                               | This study |
| EcJW215                        | EcDL002/pJW007 pJW029; cm <sup>R</sup> kan <sup>R</sup>                                                                                                                                                                               | This study |
| EcJW216                        | EcDL002/pJW007 pJW030; cm <sup>R</sup> kan <sup>R</sup>                                                                                                                                                                               | This study |
| EcJW217                        | EcDL002/pJW007 pJW031; cm <sup>R</sup> kan <sup>R</sup>                                                                                                                                                                               | This study |
| EcJW218                        | EcDL002/pJW007 pJW032; cm <sup>R</sup> kan <sup>R</sup>                                                                                                                                                                               | This study |
| EcJW219                        | EcDL002/pJW007 pJW033; cm <sup>R</sup> kan <sup>R</sup>                                                                                                                                                                               | This study |
| EcJW220                        | EcDL002/pJW007 pJW034; cm <sup>R</sup> kan <sup>R</sup>                                                                                                                                                                               | This study |
| EcJW221                        | EcDL002/pJW007 pJW035; cm <sup>R</sup> kan <sup>R</sup>                                                                                                                                                                               | This study |
| EcJW109                        | EcDL002/pJW027; kan <sup>R</sup>                                                                                                                                                                                                      | This study |
| EcJW110                        | EcDL002/pJW028; kan <sup>R</sup>                                                                                                                                                                                                      | This study |
| EcJW111                        | EcDL002/pJW029; kan <sup>R</sup>                                                                                                                                                                                                      | This study |
| EcJW112                        | EcDL002/pJW030; kan <sup>R</sup>                                                                                                                                                                                                      | This study |
| EcJW113                        | EcDL002/pJW031; kan <sup>R</sup>                                                                                                                                                                                                      | This study |
| EcJW114                        | EcDL002/pJW032; kan <sup>R</sup>                                                                                                                                                                                                      | This study |
| EcJW115                        | EcDL002/pJW033; kan <sup>R</sup>                                                                                                                                                                                                      | This study |
| EcJW116                        | EcDL002/pJW034; kan <sup>R</sup>                                                                                                                                                                                                      | This study |
| EcJW117                        | EcDL002/pJW035; kan <sup>R</sup>                                                                                                                                                                                                      | This study |

720

721 **Table 2.** A list of plasmids used in this study

| Plasmids    | Genotypes                                                                                                                                                                            | Sources    |
|-------------|--------------------------------------------------------------------------------------------------------------------------------------------------------------------------------------|------------|
| pACYCDuet-1 | Two sets of MCS, T <sub>7</sub> promoter, P15A ori; cm <sup>R</sup>                                                                                                                  | Novagen    |
| pETDuet-1   | Two sets of MCS, T <sub>7</sub> promoter, ColE1 ori; amp <sup>R</sup>                                                                                                                | Novagen    |
| pRSFDuet-1  | Two sets of MCS, T <sub>7</sub> promoter, RSF1030 ori; kan <sup>R</sup>                                                                                                              | Novagen    |
| pETite*     | T <sub>7</sub> promoter, pBR322 ori; kan <sup>R</sup>                                                                                                                                | [10]       |
| pCT24       | pETite* P <sub>T7</sub> :: <i>pdC::adhB</i> ::T <sub>T7</sub> ; kan <sup>R</sup>                                                                                                     | [10]       |
| pCT13       | pCOLA P <sub>T7</sub> :: <i>alsS::ilvC::ilvD</i> -P <sub>T7</sub> :: <i>kivd::adhE</i> ::T <sub>T7</sub> ; kan <sup>R</sup>                                                          | [58]       |
| pDL004      | pETite* <i>ATF1</i> ; kan <sup>R</sup>                                                                                                                                               | [13]       |
| pDL005      | pETite* <i>ATF2</i> ; kan <sup>R</sup>                                                                                                                                               | [13]       |
| pDL001      | pETite* <i>SAAT</i> ; kan <sup>R</sup>                                                                                                                                               | [13]       |
| pDL006      | pETite* <i>VAAT</i> ; kan <sup>R</sup>                                                                                                                                               | [13]       |
| pCT16       | pETite* <i>atfA</i> ; kan <sup>R</sup>                                                                                                                                               | [59]       |
| pJW001      | pETite* P <sub>T7</sub> :: <i>ldhA::pct</i> ::T <sub>T7</sub> ; amp <sup>R</sup>                                                                                                     | This study |
| pJW002      | pJW001 P <sub>T7</sub> :: <i>ldhA::pct</i> -P <sub>T7</sub> :: <i>ATF1</i> ::T <sub>T7</sub> ; amp <sup>R</sup>                                                                      | This study |
| pJW003      | pJW001 P <sub>T7</sub> :: <i>ldhA::pct</i> -P <sub>T7</sub> :: <i>ATF2</i> ::T <sub>T7</sub> ; amp <sup>R</sup>                                                                      | This study |
| pJW004      | pJW001 P <sub>T7</sub> :: <i>ldhA::pct</i> -P <sub>T7</sub> :: <i>SAAT</i> ::T <sub>T7</sub> ; amp <sup>R</sup>                                                                      | This study |
| pJW005      | pJW001 P <sub>T7</sub> :: <i>ldhA::pct</i> -P <sub>T7</sub> :: <i>VAAT</i> ::T <sub>T7</sub> ; amp <sup>R</sup>                                                                      | This study |
| pJW006      | pJW001 P <sub>T7</sub> :: <i>ldhA::pct</i> -P <sub>T7</sub> :: <i>atfA</i> ::T <sub>T7</sub> ; amp <sup>R</sup>                                                                      | This study |
| pJW007      | pACYCDuet-1 P <sub>T7</sub> :: <i>ldhA::pdc::adhB</i> ::T <sub>T7</sub> ; cm <sup>R</sup>                                                                                            | This study |
| pJW008      | pETDuet-1 P <sub>T7</sub> :: <i>ldhA::pdc::adhB</i> ::T <sub>T7</sub> ; amp <sup>R</sup>                                                                                             | This study |
| pJW009      | pRSFDuet-1 P <sub>T7</sub> :: <i>ldhA::pdc::adhB</i> ::T <sub>T7</sub> ; kan <sup>R</sup>                                                                                            | This study |
| pJW010      | pACYCDuet-1 P <sub>T7</sub> :: <i>pct::VAAT</i> ::T <sub>T7</sub> ; cm <sup>R</sup>                                                                                                  | This study |
| pJW011      | pETDuet-1 P <sub>T7</sub> :: <i>pct::VAAT</i> ::T <sub>T7</sub> ; amp <sup>R</sup>                                                                                                   | This study |
| pJW012      | pRSFDuet-1 P <sub>T7</sub> :: <i>pct::VAAT</i> ::T <sub>T7</sub> ; kan <sup>R</sup>                                                                                                  | This study |
| pJW013      | pACYCDuet-1 P <sub>T7</sub> :: <i>ldhA::pdc::adhB</i> -P <sub>T7</sub> :: <i>pct::VAAT</i> ::T <sub>T7</sub> ; cm <sup>R</sup>                                                       | This study |
| pJW014      | pETDuet-1 P <sub>T7</sub> :: <i>ldhA::pdc::adhB</i> -P <sub>T7</sub> :: <i>pct::VAAT</i> ::T <sub>T7</sub> ; amp <sup>R</sup>                                                        | This study |
| pJW015      | pRSFDuet-1 P <sub>T7</sub> :: <i>ldhA::pdc::adhB</i> -P <sub>T7</sub> :: <i>pct::VAAT</i> ::T <sub>T7</sub> ; kan <sup>R</sup>                                                       | This study |
| pJW016      | pACYCDuet-1 P <sub>T7</sub> :: <i>ldhA::T<sub>T7</sub>-P<sub>AY1</sub></i> ::T <sub>T7</sub> ; cm <sup>R</sup>                                                                       | This study |
| pJW017      | pACYCDuet-1 P <sub>T7</sub> :: <i>ldhA::T<sub>T7</sub>-P<sub>AY3</sub></i> ::T <sub>T7</sub> ; cm <sup>R</sup>                                                                       | This study |
| pJW018      | pACYCDuet-1 P <sub>T7</sub> :: <i>ldhA::T<sub>T7</sub>-P<sub>AY1</sub></i> ::synRBS <sub>pdC#1</sub> :: <i>pdC::adhB</i> ::T <sub>T7</sub> ; cm <sup>R</sup>                         | This study |
| pJW019      | pACYCDuet-1 P <sub>T7</sub> :: <i>ldhA::T<sub>T7</sub>-P<sub>AY1</sub></i> ::synRBS <sub>pdC#2</sub> :: <i>pdC::adhB</i> ::T <sub>T7</sub> ; cm <sup>R</sup>                         | This study |
| pJW020      | pACYCDuet-1 P <sub>T7</sub> :: <i>ldhA::T<sub>T7</sub>-P<sub>AY3</sub></i> ::synRBS <sub>pdC#3</sub> :: <i>pdC::adhB</i> ::T <sub>T7</sub> ; cm <sup>R</sup>                         | This study |
| pJW021      | pACYCDuet-1 P <sub>T7</sub> :: <i>ldhA::T<sub>T7</sub>-P<sub>AY3</sub></i> ::synRBS <sub>pdC#4</sub> :: <i>pdC::adhB</i> ::T <sub>T7</sub> ; cm <sup>R</sup>                         | This study |
| pJW022      | pRSFDuet-1 P <sub>T7</sub> :: <i>pct</i> ::T <sub>T7</sub> -P <sub>T7</sub> ::T <sub>T7</sub> ; kan <sup>R</sup>                                                                     | This study |
| pJW023      | pRSFDuet-1 P <sub>T7</sub> ::synRBS <sub>pct#1</sub> :: <i>pct</i> ::T <sub>T7</sub> -P <sub>T7</sub> ::T <sub>T7</sub> ; kan <sup>R</sup>                                           | This study |
| pJW024      | pRSFDuet-1 P <sub>T7</sub> ::synRBS <sub>pct#2</sub> :: <i>pct</i> ::T <sub>T7</sub> -P <sub>T7</sub> ::T <sub>T7</sub> ; kan <sup>R</sup>                                           | This study |
| pJW025      | pRSFDuet-1 P <sub>T7</sub> ::synRBS <sub>pct#3</sub> :: <i>pct</i> ::T <sub>T7</sub> -P <sub>T7</sub> ::T <sub>T7</sub> ; kan <sup>R</sup>                                           | This study |
| pJW026      | pRSFDuet-1 P <sub>T7</sub> ::synRBS <sub>pct#1</sub> :: <i>pct</i> ::T <sub>T7</sub> -P <sub>T7</sub> ::synRBS <sub>VAAT#1</sub> :: <i>VAAT</i> ::T <sub>T7</sub> ; kan <sup>R</sup> | This study |
| pJW027      | pRSFDuet-1 P <sub>T7</sub> ::synRBS <sub>pct#1</sub> :: <i>pct</i> ::T <sub>T7</sub> -P <sub>T7</sub> ::synRBS <sub>VAAT#2</sub> :: <i>VAAT</i> ::T <sub>T7</sub> ; kan <sup>R</sup> | This study |
| pJW028      | pRSFDuet-1 P <sub>T7</sub> ::synRBS <sub>pct#1</sub> :: <i>pct</i> ::T <sub>T7</sub> -P <sub>T7</sub> ::synRBS <sub>VAAT#3</sub> :: <i>VAAT</i> ::T <sub>T7</sub> ; kan <sup>R</sup> | This study |
| pJW029      | pRSFDuet-1 P <sub>T7</sub> ::synRBS <sub>pct#2</sub> :: <i>pct</i> ::T <sub>T7</sub> -P <sub>T7</sub> ::synRBS <sub>VAAT#1</sub> :: <i>VAAT</i> ::T <sub>T7</sub> ; kan <sup>R</sup> | This study |
| pJW030      | pRSFDuet-1 P <sub>T7</sub> ::synRBS <sub>pct#2</sub> :: <i>pct</i> ::T <sub>T7</sub> -P <sub>T7</sub> ::synRBS <sub>VAAT#2</sub> :: <i>VAAT</i> ::T <sub>T7</sub> ; kan <sup>R</sup> | This study |
| pJW031      | pRSFDuet-1 P <sub>T7</sub> ::synRBS <sub>pct#2</sub> :: <i>pct</i> ::T <sub>T7</sub> -P <sub>T7</sub> ::synRBS <sub>VAAT#3</sub> :: <i>VAAT</i> ::T <sub>T7</sub> ; kan <sup>R</sup> | This study |
| pJW032      | pRSFDuet-1 P <sub>T7</sub> ::synRBS <sub>pct#3</sub> :: <i>pct</i> ::T <sub>T7</sub> -P <sub>T7</sub> ::synRBS <sub>VAAT#1</sub> :: <i>VAAT</i> ::T <sub>T7</sub> ; kan <sup>R</sup> | This study |
| pJW033      | pRSFDuet-1 P <sub>T7</sub> ::synRBS <sub>pct#3</sub> :: <i>pct</i> ::T <sub>T7</sub> -P <sub>T7</sub> ::synRBS <sub>VAAT#2</sub> :: <i>VAAT</i> ::T <sub>T7</sub> ; kan <sup>R</sup> | This study |
| pJW034      | pRSFDuet-1 P <sub>T7</sub> ::synRBS <sub>pct#3</sub> :: <i>pct</i> ::T <sub>T7</sub> -P <sub>T7</sub> ::synRBS <sub>VAAT#3</sub> :: <i>VAAT</i> ::T <sub>T7</sub> ; kan <sup>R</sup> | This study |
| pJW035      | pRSFDuet-1 P <sub>T7</sub> ::synRBS <sub>pct#3</sub> :: <i>pct</i> ::T <sub>T7</sub> -P <sub>T7</sub> ::synRBS <sub>VAAT#3</sub> :: <i>VAAT</i> ::T <sub>T7</sub> ; kan <sup>R</sup> | This study |

723 **Table 3.** A list of primers used in this study

| <b>Primers</b>                               | <b>Sequences (5'→3')</b>                                       |
|----------------------------------------------|----------------------------------------------------------------|
| <i>Pyruvate-to-lactyl-CoA module</i>         |                                                                |
| DL_0001                                      | CATCATCACCACCATCACTAA                                          |
| DL_0002                                      | ATGTATATCTCCTTCTTATAGTTAAAC                                    |
| DL_0032                                      | TAGAAATAATTTTGTTTAACTATAAGAAGGAGATATACATATGAAACTCGCCGTTTATAG   |
| DL_0033                                      | GGGAACCTTTCTCATTATATCTCCTTTTAAACCAGTTCGTTCCGGGC                |
| DL_0034                                      | ACGAACTGGTTTAAAAGGAGATATAATGAGAAAGGTTCCCATTAT                  |
| DL_0035                                      | GCCGCTCTATTAGTGATGGTGGTGATGATGTCAGGACTTCATTTCCCTTCAG           |
| <i>Pyruvate-to-lactate ester module</i>      |                                                                |
| DL_0013                                      | GAGCCTCAGACTCCAGCGTA                                           |
| DL_0014                                      | ATATCAAGCTTGAATTCGTTACCCGG                                     |
| DL_0015                                      | GGAGGAACTATATCCGGGTAACGAATTCAGCTTGATATTAATACGACTCACTATAGGG     |
| DL_0016                                      | GTCCAGTTACGCTGGAGTCTGAGGCTC                                    |
| <i>Upstream module</i>                       |                                                                |
| JW_0001                                      | GGGCAGCAGCCATCACCATCATCACCACAGCCAGGATCCATGAAACTCGCCGTTTATAGC   |
| JW_0002                                      | CTAAATAGGTACCGACAGTATAACTCATTATATCTCCTTTTAAACCAGTTCGTTCCGGGC   |
| JW_0003                                      | CGAAACCTGCCCCGAACGAACCTGGTTTAAAAGGAGATATAATGAGTTATACTGTCCGTACC |
| JW_0004                                      | CGCAAGCTTGTCGACCTGCAGGCGCGCCGAGCTCGAATTCTTAGAAAGCGCTCAGGAAG    |
| JW_0005                                      | GGATCCTGGCTGTGGTGATGA                                          |
| JW_0006                                      | GAATTCGAGCTCGGCGCG                                             |
| <i>Downstream module</i>                     |                                                                |
| JW_0007                                      | GTATATTAGTTAAGTATAAGAAGGAGATATACATATGATGAGAAAGGTTCCCATTATTAC   |
| JW_0008                                      | GAAATTATACTGACCTCAATTTTCTCCATTATATCTCCTTTCAGGACTTCATTTCCCTTC   |
| JW_0009                                      | AATGGGTCTGAAGGAAATGAAGTCCTGAAAGGAGATATAATGGAGAAAATTGAGGTCAG    |
| JW_0010                                      | CAAATTTTCGACGAGCGGTTTCTTTACCAGACTCGAGTCAATATCTTGAAATTAGCGTCT   |
| JW_0011                                      | CATATGTATATCTCCTTCTTATACTTAACT                                 |
| JW_0012                                      | CTCGAGTCTGGTAAAGAAAC                                           |
| <i>Synthetic operons for upstream module</i> |                                                                |
| JW_0013                                      | GGGAATTGTGAGCGGATAACAATTCCCCAAGGAGATATAATGAAACTCGCCGTTTATAGC   |
| JW_0014                                      | TTATGCTAGTTATTGCTCAGCGGTGGCGGCCGCTCTATTATTAACCAGTTCGTTCCGG     |
| JW_0015                                      | TCTGGAAAAAGGCGAAACCTGCCCGAACGAACCTGGTTTAAATAATAGAGCGGCCGC      |
| JW_0016                                      | GATTATGCGGCCGTGTACAATACGATTACTTTCTGTTCGATTTCTACCGAAGAAAGGC     |
| JW_0017                                      | CATTATATCTCCTTGGGGAATTGTTATCCGC                                |
| JW_0018                                      | TCGAACAGAAAGTAATCGTATTG                                        |
| JW_0019                                      | AAATTTGACGGCTAGCTCAGTCCTAGGTACAGTGCTAGCATGAGTTATACTGTCCGTACC   |
| JW_0020                                      | GCGTTCAAATTTTCGACGAGCGGTTTCTTTACCAGACTCGAGTTAGAAAGCGCTCAGGAA   |
| JW_0021                                      | AAATCTGACAGCTAGCTCAGTCCTAGGTATAATGCTAGCATGAGTTATACTGTCCGTACC   |

---

JW\_0022 CATGCTAGCACTGTACCTAGGACTGAGCTAGCCGTCAAATTTTCGATTATGCGGCC  
JW\_0023 CATGCTAGCATTATACCTAGGACTGAGCTAGCTGTCAGATTTTCGATTATGCGGCC  
JW\_0024 TACAGTGCTAGCAGCTTAGCGACAACCCTAGGCGCTCGCATGAGTTATACTGTCGGTACC  
JW\_0025 GTATAATGCTAGCTTAGCAGTACCAGGACGTACCGGAGTATGAGTTATACTGTCGGTACC  
JW\_0026 TAGGTACAGTGCTAGCACTAGGCCTAGCGATTCCGCTAAATGAGTTATACTGTCGGTACC  
JW\_0027 TATAATGCTAGCAGTTTACCTAGGGCAATAGCGTACCGAATGAGTTATACTGTCGGTACC  
JW\_0028 CATGCGAGCGCCTAGGGTTGTCGCTAAGCTGCTAGCACTGTACCTAGG  
JW\_0029 CATTAGCGGAATCGCTAGGCCTAGTGCTAGCACTGTACCTAGG  
JW\_0030 CATACTCCGGTACGTCCTGGTACTGCTAAGCTAGCATTATACCTAGG  
JW\_0031 CATTCCGGTACGCTATTGCCCTAGGTAAACTGCTAGCATTATACCTAGG

*Synthetic operons for downstream module*

JW\_0032 TTATGCTAGTTATTGCTCAGCGGTGGCGGCCGCTCTATTATCAGGACTTCATTTCCCTCA  
JW\_0033 TGCAGAAGGCTTAATGGGTCTGAAGGAAATGAAAGTCCTGATAATAGAGCGGCCGC  
JW\_0034 GATTATGCGGCCGTGTACAATACGATTACTTTCTGTTCGATTTCTACCGAAGAAAGGC  
JW\_0035 GATATAGCTCGAACGCGGAAAGAGATGAGAAAGGTTCCATTATTAC  
JW\_0036 TCAGGACTTCATTTCCCTCA  
JW\_0037 GCAACCTATTTAATCCAAGGAAGATCTAATGAGAAAGGTTCCATTATTAC  
JW\_0038 GCAATAACAACCTAGGAGAGACGACATGAGAAAGGTTCCATTATTAC  
JW\_0039 TAATGGGAACCTTTCTCATCTCTTTCCGCGTTCGAGCTATATCGGGGAATTGTTATCCGC  
JW\_0040 TGCAGAAGGCTTAATGG  
JW\_0041 GGAACCTTTCTCATTAGATCTTCCTTGGATTAAAATAGGTTGCGGGGAATTGTTATCCGC  
JW\_0042 TAATGGGAACCTTTCTCATGTCTCTCCTAGTTGTTATTGCGGGGAATTGTTATCCGC  
JW\_0043 TAACCAAAACACTAACGCAAGATGGAGAAAATTGAGGTCAGT  
JW\_0044 AGGGCACGAGGAGGAACAGTAGAATGGAGAAAATTGAGGTCAGT  
JW\_0045 GCAACCAACACAACGAGGAGGCATTTAATGGAGAAAATTGAGGTCAGT  
JW\_0046 TACTGACCTCAATTTTCTCCATCTTGCCTTAGTGTTTTGGTTAGGGGAATTGTTATCCGC  
JW\_0047 CTCAATTTTCTCCATTCTACTGGTTCCTCCTCGTGCCCTGGGGAATTGTTATCCGC  
JW\_0048 CTCAATTTTCTCCATTAAATGCCTCCTCGTTGTGTTGGTTGCGGGGAATTGTTATCCGC

---

724

725

726

## 727 **Figure Legends**

728

729 **Figure 1.** *In vivo* characterization of various alcohol acyltransferases for biosynthesis of lactate  
730 esters. **(A)** Biosynthesis pathways of lactate and acetate esters with external supply of alcohols.  
731 **(B)** Ester production of EcJW101, EcJW102, EcJW103, EcJW104, and EcJW105 harboring *ATF1*,  
732 *ATF2*, *SAAT*, *VAAT*, and *atfA*, respectively in high cell density cultures with various alcohol  
733 doping. Each error bar represents 1 standard deviation (s.d.,  $n=3$ ). Symbols: *n.s.*, not significant,  
734 \* $p$ -value  $< 0.073$ , and \*\* $p$ -value  $< 0.013$  (Student's test). **(C)** The library of esters produced. Green  
735 check marks indicate the esters produced in this study while red star marks indicate the esters  
736 produced for first time in engineered strains.

737

738 **Figure 2.** Design, construction, and validation of the lactate ester biosynthesis pathways in *E. coli*.  
739 **(A)** Engineered biosynthesis pathway of ethyl lactate from glucose and its production in high cell  
740 density culture of EcJW201. **(B)** Engineered biosynthesis pathway of isobutyl lactate from glucose  
741 and its production in high cell density culture of EcJW202. In Fig. 2A and 2B, all of the strains  
742 were induced at 0 h with 0.5 mM IPTG. Each error bar represents 1 s.d. ( $n=3$ ). **(C)** Production of  
743 ethyl lactate from glucose in pH-controlled batch fermentation of EcJW201. The strain was  
744 induced at 6 h with 0.5 mM IPTG. Each error bar represents 1 s.d. ( $n=2$ ).

745

746 **Figure 3.** Combinatorial modular pathway optimization of enhanced ethyl lactate biosynthesis by  
747 varying plasmid copy number. **(A)** Re-modularization of the ethyl lactate biosynthesis pathway.  
748 Pyruvate-to-lactate ester and ethanol modules were re-modulated into upstream and downstream  
749 modules using plasmids with different copy numbers. **(B)** Ethyl lactate production, **(C)** OD<sub>600</sub>, **(D)**

750 consumed glucose, (E) acetate, (F) lactate, (G) ethanol, and (H) ethyl acetate of EcJW106-108  
751 and EcJW203-208 in high cell density cultures induced with various concentrations of IPTG.  
752 Green rectangle: low copy number plasmid (10); P15A: origin of pACYCDuet-1; Blue rectangle:  
753 medium copy number plasmid (40); ColE1: origin of pETDuet-1; Red rectangle: high copy number  
754 plasmid (100); RSF1030: origin of pRSFDuet-1; P<sub>T7</sub>: T7 promoter; T<sub>T7</sub>: T7 terminator. All of the  
755 strains were induced at 0 h with 0.01, 0.1, or 1.0 mM IPTG, respectively. Each error bar represents  
756 1 s.d. ( $n=3$ ). Red arrows indicate the selected strain with an optimum concentration of IPTG for  
757 the further studies.

758

759 **Figure 4.** Probing and alleviating the potential metabolic bottlenecks of the upstream or  
760 downstream modules of EcJW204 by varying the strength of promoters and/or ribosome binding  
761 sites. (A) Design of synthetic operons for the upstream and downstream modules. For the upstream  
762 module, the T7 promoter in MCS2 and the RBS between T7 promoter in MCS2 and the start codon  
763 of *pdg* were replaced with the combination of P<sub>AY1</sub> or P<sub>AY3</sub> promoter and 0.3 or 0.03au RBS. For  
764 the downstream module, the RBS between T7 promoter in MCS1 and the start codon of *pct* gene  
765 and the RBS between T7 promoter in MCS2 and the start codon of *VAAT* gene were replaced with  
766 the combination of 90, 9000, or 90000au RBS and 90, 9000, or 90000au RBS, respectively.  
767 Production of ethyl lactate in high cell density cultures of (B) EcJW209-212 and (C) EcJW213-  
768 221. Green rectangle: low copy number plasmid (10); P15A: origin of pACYCDuet-1; Red  
769 rectangle: high copy number plasmid (100); RSF1030: origin of pRSFDuet-1; P<sub>T7</sub>: T7 promoter;  
770 T<sub>T7</sub>: T7 terminator. All of the strains were induced at 0 h with 0.01 mM IPTG. Each error bar  
771 represents 1 s.d. ( $n=3$ ).

772



773 **Figure 5. (A)** Total esters and **(B)** composition of total esters produced in high cell density cultures  
774 of EcJW209-212 with or without addition of ethanol. **(C)** Ethyl lactate production of EcJW109-  
775 117 with addition of 2 g/L of lactate and ethanol. Red rectangle: high copy number plasmid (100);  
776 RSF1030: origin of pRSFDuet-1; P<sub>T7</sub>: T7 promoter; T<sub>T7</sub>: T7 terminator. All of the strains were  
777 induced at 0 h with 0.01 mM IPTG. Each error bar represents 1 s.d. ( $n=3$ ).  
778

779 **Figure 1**  
780

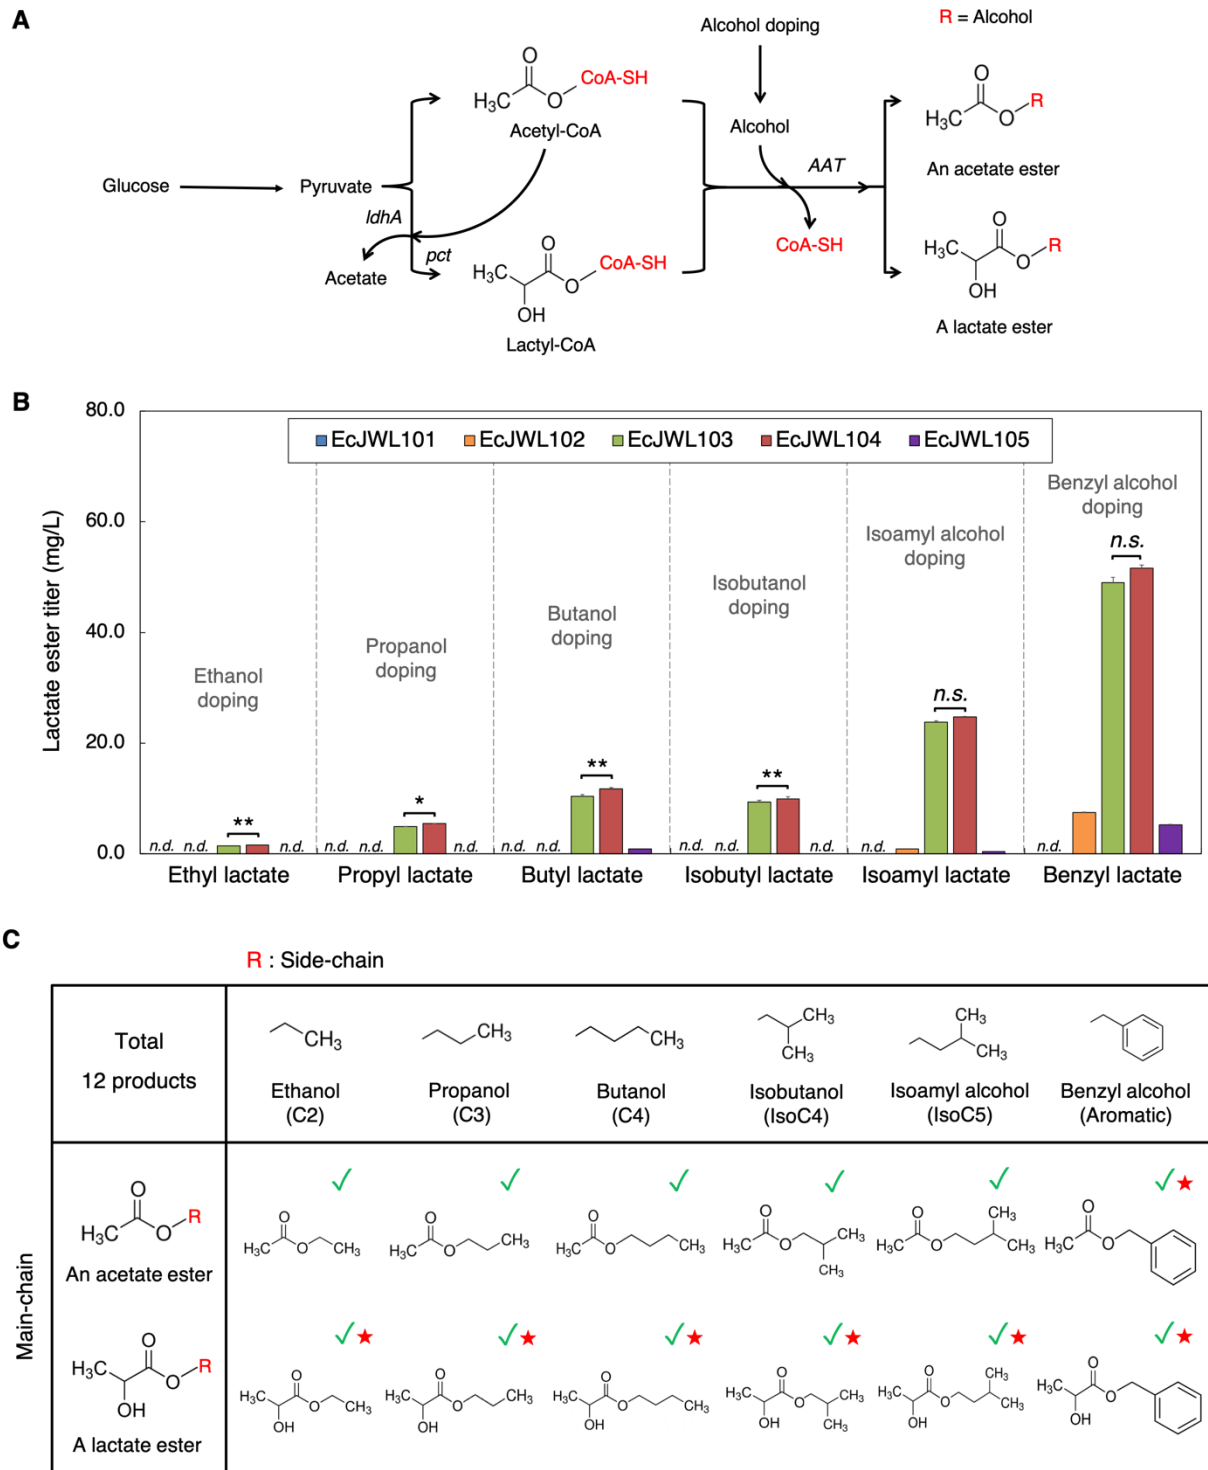

781

782 **Figure 2**

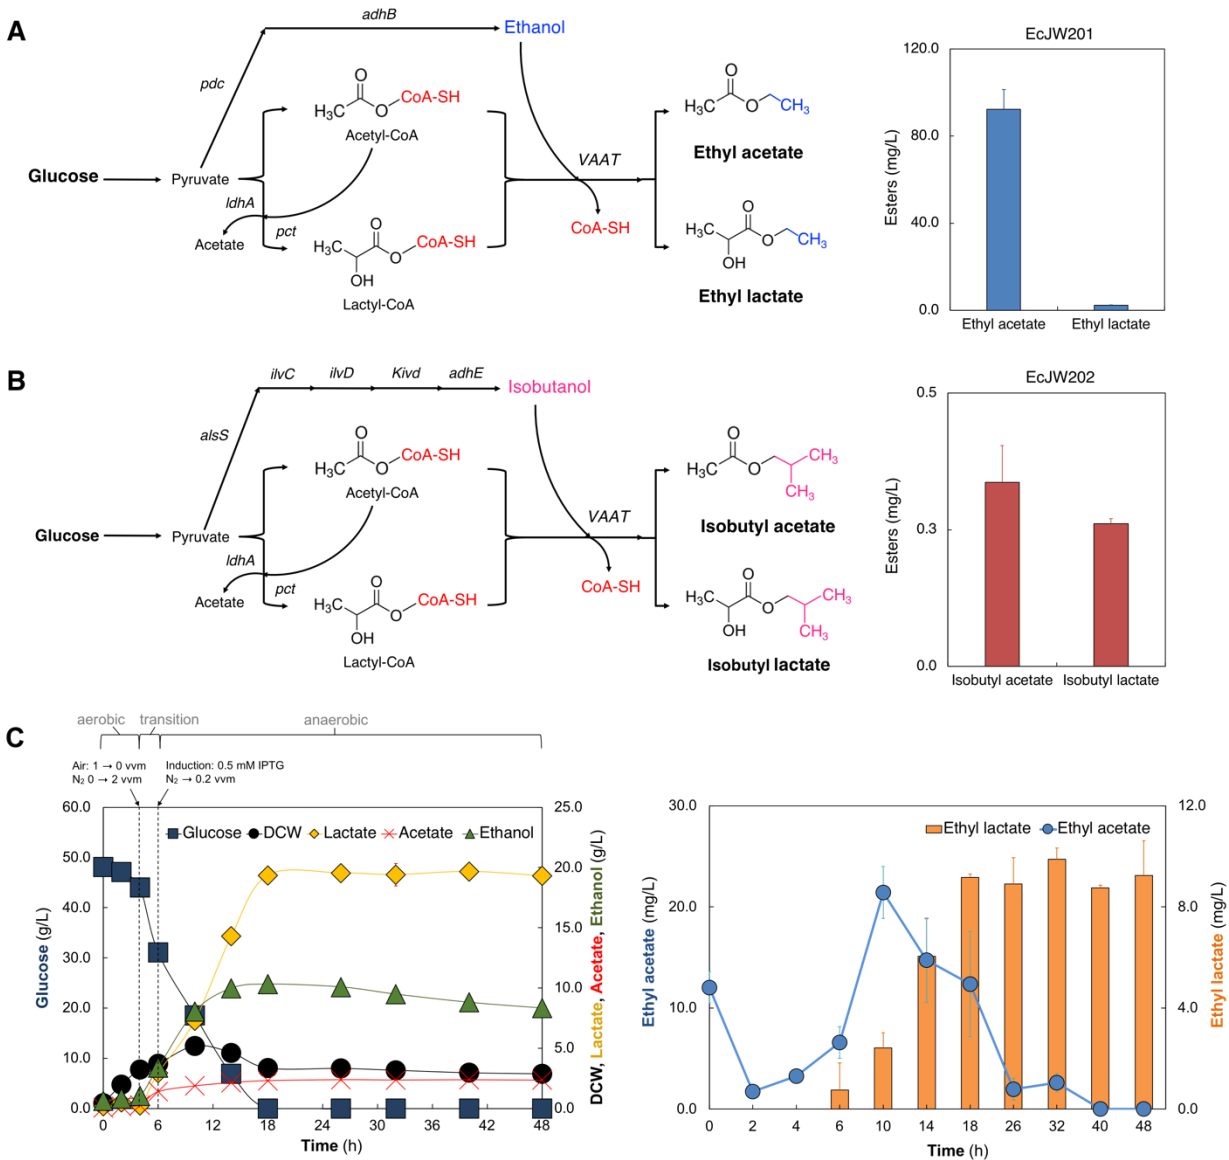

783

784

785

786

787

788 **Figure 3**

**A**

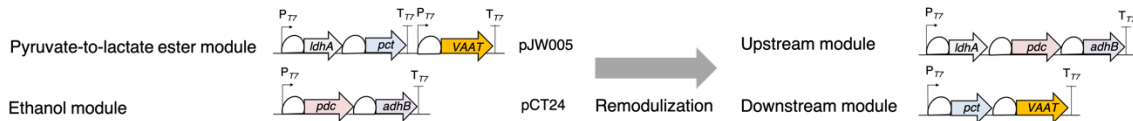

**B**

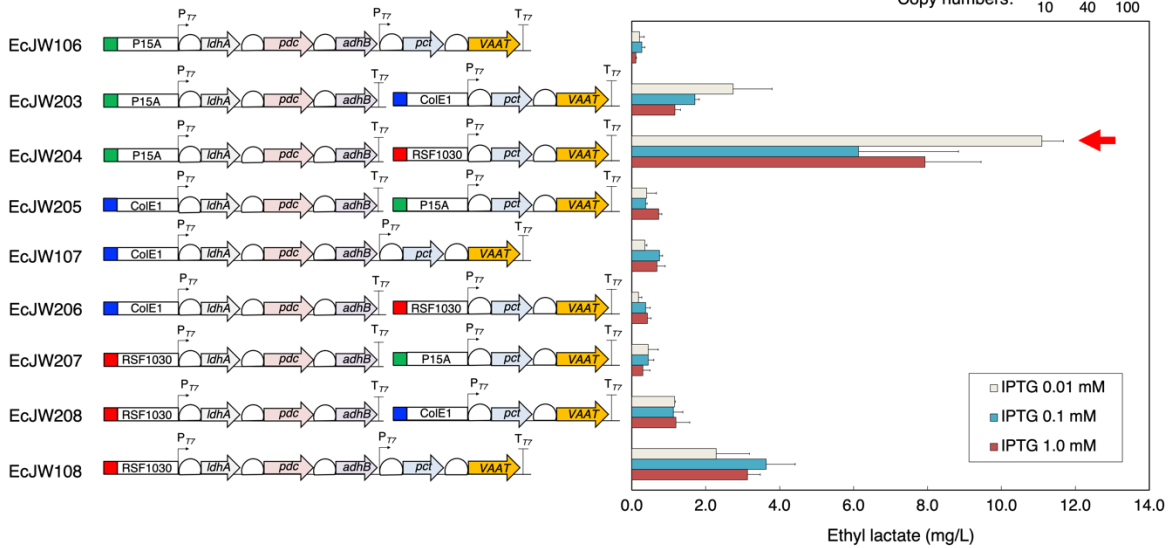

**C**

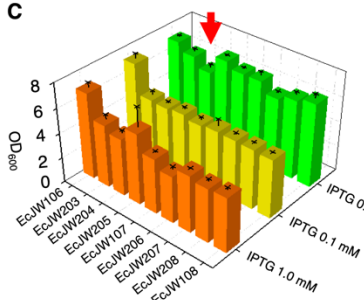

**D**

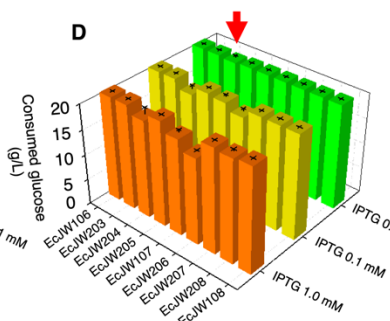

**E**

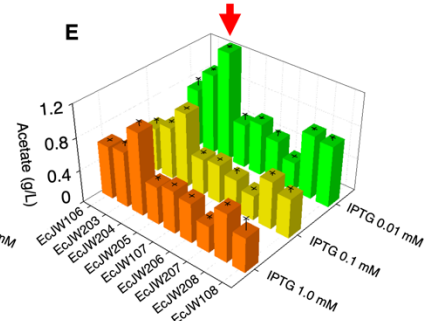

**F**

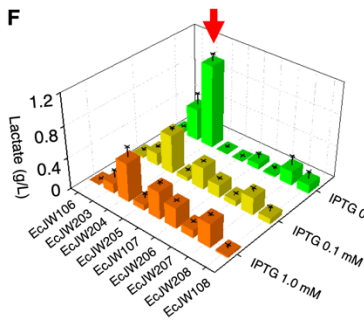

**G**

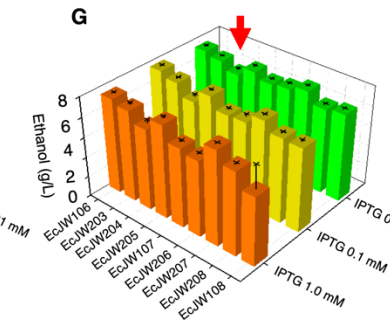

**H**

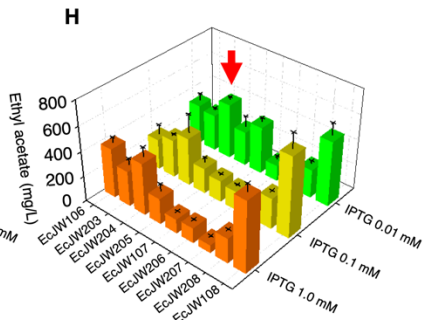

789

790 **Figure 4**

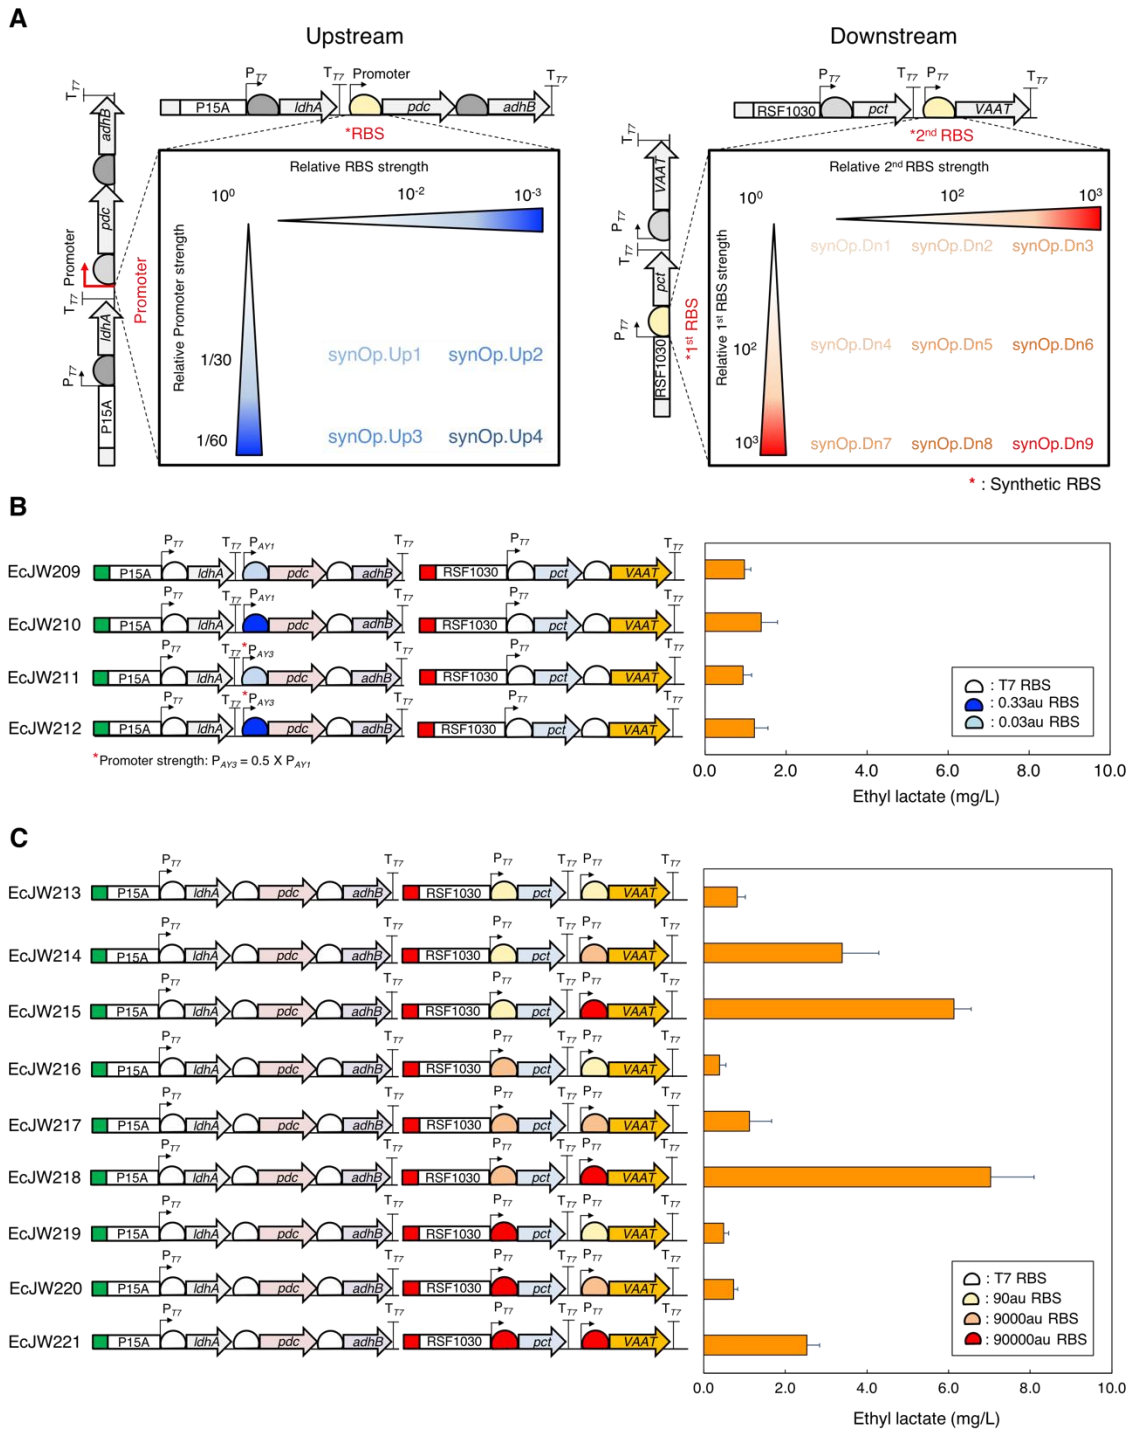

791

792 **Figure 5**

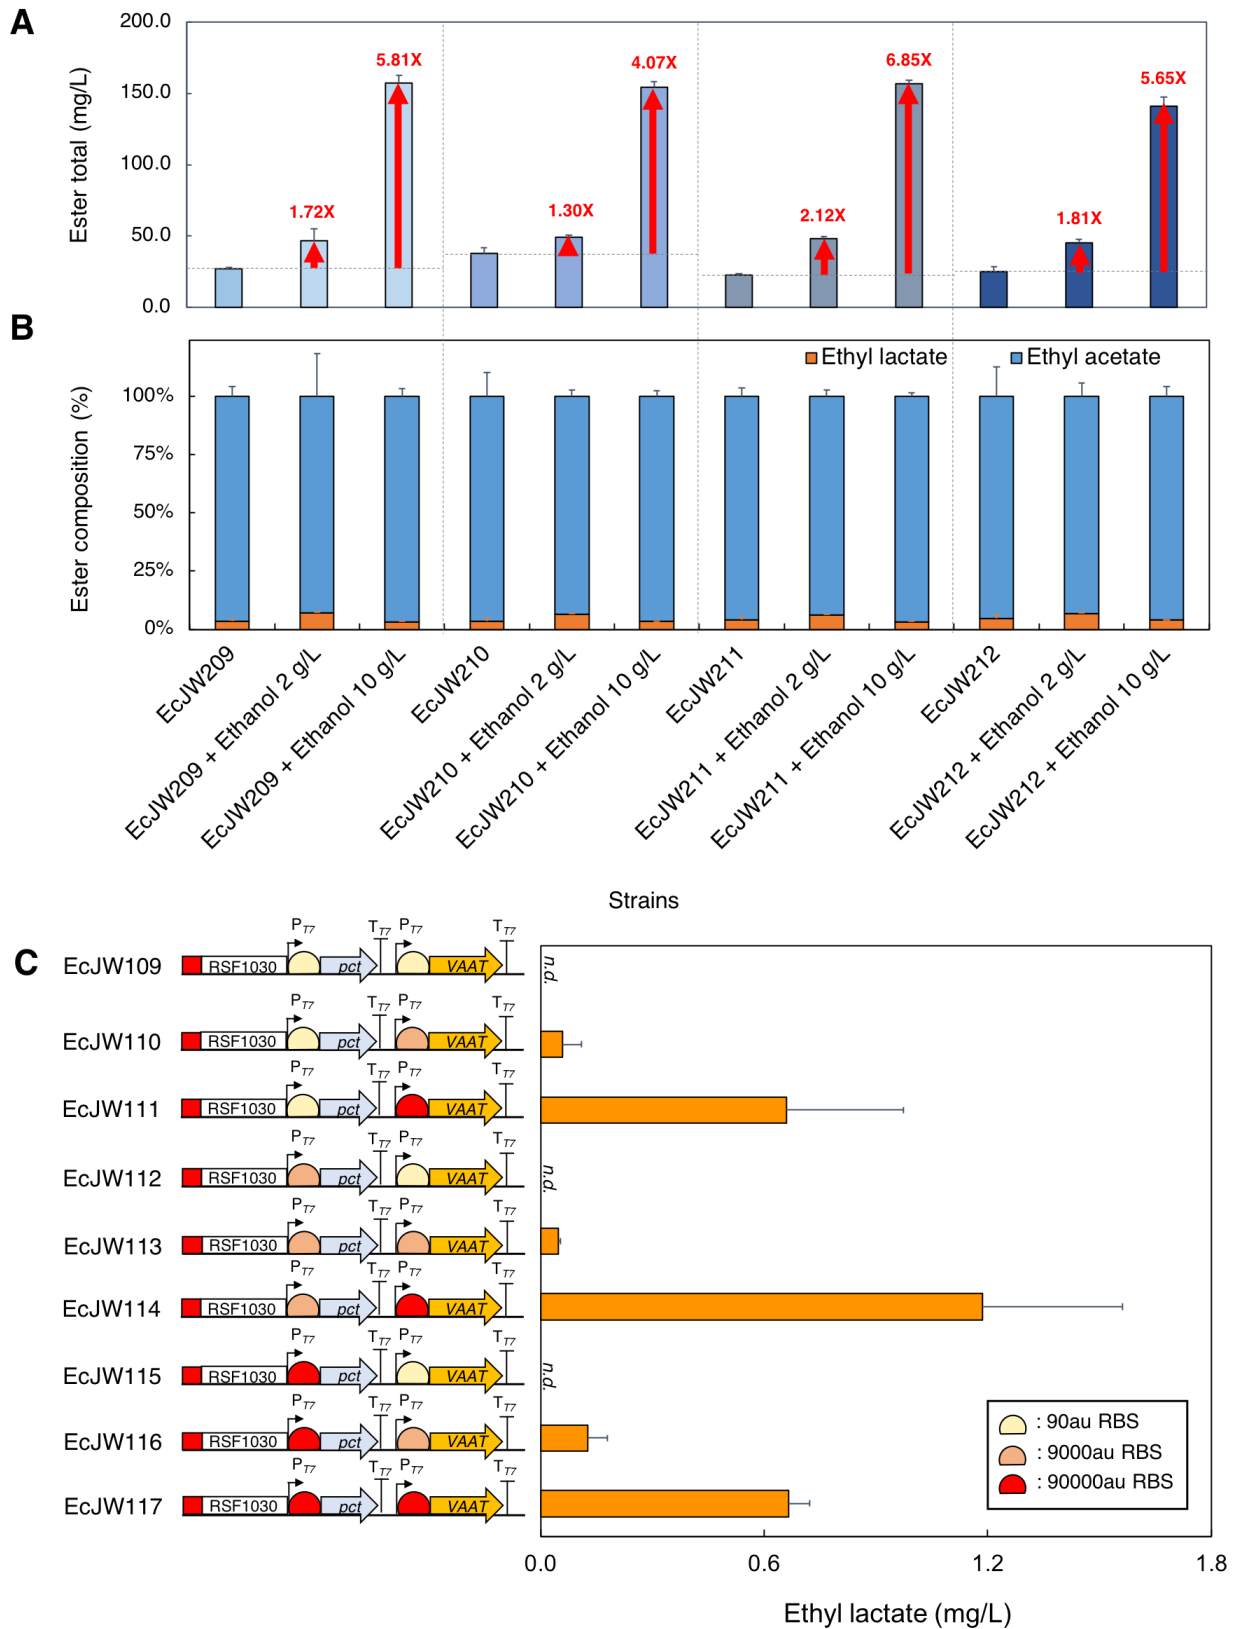

793
